# Supplementary material for: Oxidative/Nitrative Stress and Inflammation Drive Progression of Doxorubicin-Induced Renal Fibrosis in Rats as Revealed by Comparing a Normal and a Fibrosis-Resistant Rat Strain
Source: PubMed Central journal article supplement (PMC4473269; doi:10.1371/journal.pone.0127090), 2015-06-18

**Oxidative/nitrative stress and inflammation drive progression of doxorubicin-induced renal fibrosis in rats as revealed by comparing a normal and a fibrosis-resistant rat strain**

PONE-D-14-55246 supplementary information

| <b>A: Long-term survival</b> |        | <b>B Short-term survival</b> |          |
|------------------------------|--------|------------------------------|----------|
| Animal ID                    | Weeks  | Animal ID                    | Weeks    |
| CD-Surv5                     | 12,286 | CD-Surv10                    | 1,571429 |
| CD-Surv5                     | 12     | CD-Surv10                    | 1,142857 |
| CD-Surv5                     | 12,571 | CD-Surv10                    | 1,571429 |
| CD-Surv5                     | 12,857 | CD-Surv10                    | 1,285714 |
| CD-Surv5                     | 12,143 | CD-Surv10                    | 1,428571 |
| CD-Surv5                     | 12,143 | CD-Surv10                    | 1,428571 |
| CD-Surv5                     | 12,286 | CD-Surv10                    | 1,428571 |
| CD-Surv5                     | 10,714 | CD-Surv10                    | 1,285714 |
| BH-Surv5                     | 16,429 | BH-Surv10                    | 2,428571 |
| BH-Surv5                     | 22,714 | BH-Surv10                    | 2,571429 |
| BH-Surv5                     | 12,286 | BH-Surv10                    | 1,857143 |
| BH-Surv5                     | 12,429 | BH-Surv10                    | 1,857143 |
| BH-Surv5                     | 16     | BH-Surv10                    | 1,285714 |
| BH-Surv5                     | 12,571 | BH-Surv10                    | 2,571429 |

**A: Body weight changes (g)**

| Animal ID | Week 0 | Week 2 | Week 4 | Week 6 | Week 8 |
|-----------|--------|--------|--------|--------|--------|
| CD/c      | 347,5  | 439    | 503    | 548    | 589    |
| CD/c      | 319    | 380,5  | 426    | 462    | 491    |
| CD/c      | 288    | 361    | 393    | 417    | 437    |
| CD/c      | 347    | 427    | 490    | 525    | 548    |
| CD/DXR    | 376    | 425    | 420    | 414    | 407    |
| CD/DXR    | 347,5  | 397    | 403    | 407    | 385    |
| CD/DXR    | 307    | 342    | 349    | 366    | 331    |
| CD/DXR    | 292,5  | 345    | 389    | 372    | 306    |
| CD/DXR    | 282,5  | 323,5  | 343    | 353    | 317    |
| CD/DXR    | 304,5  | 342    | 375    | 386    | 366    |
| CD/DXR    | 325    | 376    | 394    | 414    | 333    |
| CD/DXR    | 349,5  | 406    | 413    | 421    | 333    |
| BH/c      | 218    | 267    | 299    | 328    | 340    |
| BH/c      | 204    | 245,5  | 272    | 299    | 314    |
| BH/c      | 186,5  | 223    | 253    | 270    | 285    |
| BH/c      | 211    | 241    | 274    | 294    | 301    |
| BH/c      | 202,5  | 268    | 280    | 301    | 307    |
| BH/DXR    | 207    | 228,5  | 272    | 285    | 287    |
| BH/DXR    | 201    | 223,5  | 261    | 272    | 272    |
| BH/DXR    | 213    | 237,5  | 260    | 268    | 273    |
| BH/DXR    | 204,5  | 227    | 253    | 270    | 278    |
| BH/DXR    | 207,5  | 228    | 250    | 261    | 267    |
| BH/DXR    | 191,5  | 216,5  | 237    | 247    | 250    |
| BH/DXR    | 205    | 216    | 258    | 273    | 275    |
| BH/DXR    | 189,5  | 207,5  | 235    | 244    | 218    |
| BH/DXR    | 199    | 237    | 242    | 253    | 249    |
| BH/DXR    | 211,5  | 239    | 234    | 246    | 253    |

**B: Urine protein excretion (mg/24h)**

| Animal ID | Week 0 | Week 2 | Week 4 | Week 6 | Week 8 |
|-----------|--------|--------|--------|--------|--------|
| CD/c      | 15,15  | 9,31   | 35,54  | 9,48   | 15,18  |
| CD/c      | 24,04  | 21,71  | 19,18  | 10,3   | 21,55  |
| CD/c      | 4,9    | 9,33   | 3,16   | 8,35   | 11,69  |
| CD/c      | 9,02   | 13,96  | 5,88   | 19,02  | 11,65  |
| CD/DXR    | 9,48   | 490,25 | 582,67 | 593,25 | 687,75 |
| CD/DXR    | 7      | 285,54 | 116,38 | 712,73 | 657    |
| CD/DXR    | 13,92  | 156,56 | 418,98 | 325,08 | 610,71 |
| CD/DXR    | 10,47  | 54,02  | 336,4  | 465,52 | 402,86 |
| CD/DXR    | 12,65  | 139,67 | 308,87 | 457    | 417,04 |
| CD/DXR    | 5,67   | 196,05 | 329,33 | 340,37 | 524,15 |
| CD/DXR    | 7,52   | 281,18 | 312,31 | 638,47 | 481,72 |
| CD/DXR    | 21,11  | 229,04 | 318,76 | 169,94 | 284,47 |
| BH/c      | 6,18   | 13,21  | 18,69  | 14,51  | 14,17  |
| BH/c      | 3,45   | 11,89  | 12,67  | 16,24  | 6,94   |
| BH/c      | 13,25  | 13,09  | 16,05  | 11,05  | 14,54  |
| BH/c      | 9,77   | 12,17  | 11,41  | 11     | 12,97  |
| BH/c      | 8,33   | 15,63  | 10,14  | 6,46   | 11,48  |
| BH/DXR    | 9,73   | 17,79  | 147,81 | 205,68 | 345,43 |
| BH/DXR    | 11,58  | 47,2   | 188,46 | 210,97 | 230,89 |
| BH/DXR    | 15,63  | 22,15  | 304,63 | 323,33 | 384,64 |
| BH/DXR    | 18,5   | 31,63  | 27,55  | 179,29 | 251,24 |
| BH/DXR    | 23,22  | 39,49  | 157,56 | 311,8  | 403,9  |
| BH/DXR    | 13,41  | 39,95  | 123,66 | 143,67 | 302,62 |
| BH/DXR    | 16,75  | 27,5   | 41,61  | 254,16 | 332,19 |
| BH/DXR    | 3,6    | 37,57  | 193,83 | 253,6  | 332,03 |
| BH/DXR    | 9,49   | 41,52  | 234,81 | 274,13 | 322    |
| BH/DXR    | 27,61  | 24,3   | 391,21 | 309,13 | 346,68 |

**C: Urine NGALn excretion (ug/24h)**

| Animal ID | Week 0 | Week 2 | Week 4 | Week 6 | Week 8 |
|-----------|--------|--------|--------|--------|--------|
| CD/c      | 2,748  | 3,363  | 3,095  | 2,873  | 1,285  |
| CD/c      | 3,638  | 2,272  | 2,288  | 2,706  | 0,785  |
| CD/c      | 1,860  | 2,303  | 1,585  | 1,819  | 0,664  |
| CD/c      | 1,817  | 4,415  | 2,560  | 3,458  | 1,163  |
| CD/DXR    | 1,860  | 6,753  | 13,165 | 19,583 | 10,274 |
| CD/DXR    | 1,438  | 7,958  | 17,334 | 20,860 | 19,276 |
| CD/DXR    | 1,757  | 3,671  | 11,707 | 18,811 | 18,965 |
| CD/DXR    | 1,987  | 3,707  | 8,531  | 10,147 | 12,081 |
| CD/DXR    | 2,022  | 3,767  | 9,362  | 11,436 | 10,131 |
| CD/DXR    | 4,485  | 7,113  | 11,455 | 11,760 | 7,400  |
| CD/DXR    | 1,159  | 6,590  | 11,761 | 13,583 | 8,072  |
| BH/c      | 0,932  | 1,751  | 4,207  | 4,925  | 2,310  |
| BH/c      | 0,823  | 2,410  | 2,396  | 3,476  | 0,879  |
| BH/c      | 1,710  | 2,361  | 1,235  | 2,444  | 0,816  |
| BH/c      | 1,513  | 2,572  | 1,844  | 1,042  | 0,931  |
| BH/c      | 1,316  | 2,823  | 2,333  | 1,661  | 0,555  |
| BH/DXR    | 2,479  | 3,078  | 5,534  | 7,900  | 3,949  |
| BH/DXR    | 1,370  | 2,968  | 4,224  | 5,688  | 5,441  |
| BH/DXR    | 1,649  | 1,859  | 5,752  | 11,440 | 6,721  |
| BH/DXR    | 1,241  | 2,712  | 3,531  | 6,039  | 5,145  |
| BH/DXR    | 2,137  | 6,855  | 5,587  | 11,244 | 6,283  |
| BH/DXR    | 1,304  | 5,425  | 4,072  | 5,783  | 5,156  |
| BH/DXR    | 2,586  | 3,280  | 5,096  | 7,132  | 4,221  |
| BH/DXR    | 2,211  | 2,431  | 5,417  | 7,433  | 3,040  |
| BH/DXR    | 2,537  | 4,896  | 6,700  | 7,930  | 10,942 |
| BH/DXR    | 2,843  | 2,256  | 14,021 | 5,314  | 5,949  |

| <b>A-C: Glomerular score</b> |             | <b>D-F: Tubular score</b> |             | <b>G-I: Inflammation score</b> |             |
|------------------------------|-------------|---------------------------|-------------|--------------------------------|-------------|
| Animal ID                    | Score value | Animal ID                 | Score value | Animal ID                      | Score value |
| CD/c                         | 0,039       | CD/c                      | 0           | CD/c                           | 0,1         |
| CD/c                         | 0,071       | CD/c                      | 0           | CD/c                           | 0,15        |
| CD/c                         | 0,058       | CD/c                      | 0           | CD/c                           | 0,13        |
| CD/c                         | 0,063       | CD/c                      | 0           | CD/c                           | 0,3         |
| CD/DXR                       | 0,819       | CD/DXR                    | 2,65        | CD/DXR                         | 1,81        |
| CD/DXR                       | 1,101       | CD/DXR                    | 2,625       | CD/DXR                         | 2,1         |
| CD/DXR                       | 0,975       | CD/DXR                    | 2,789       | CD/DXR                         | 1,87        |
| CD/DXR                       | 0,385       | CD/DXR                    | 1           | CD/DXR                         | 1,38        |
| CD/DXR                       | 0,619       | CD/DXR                    | 1,5         | CD/DXR                         | 1,68        |
| CD/DXR                       | 0,905       | CD/DXR                    | 1,682       | CD/DXR                         | 1,56        |
| CD/DXR                       | 0,831       | CD/DXR                    | 2,036       | CD/DXR                         | 1,37        |
| CD/DXR                       | 0,679       | CD/DXR                    | 1,786       | CD/DXR                         | 1,09        |
| BH/c                         | 0,058       | BH/c                      | 0           | BH/c                           | 0,24        |
| BH/c                         | 0,024       | BH/c                      | 0           | BH/c                           | 0,17        |
| BH/c                         | 0,032       | BH/c                      | 0           | BH/c                           | 0,18        |
| BH/c                         | 0,161       | BH/c                      | 0           | BH/c                           | 0,15        |
| BH/c                         | 0,01        | BH/c                      | 0           | BH/c                           | 0,17        |
| BH/DXR                       | 0,286       | BH/DXR                    | 1,5         | BH/DXR                         | 1,14        |
| BH/DXR                       | 0,244       | BH/DXR                    | 0,705       | BH/DXR                         | 0,87        |
| BH/DXR                       | 0,485       | BH/DXR                    | 1,421       | BH/DXR                         | 1,43        |
| BH/DXR                       | 0,14        | BH/DXR                    | 0,867       | BH/DXR                         | 1,14        |
| BH/DXR                       | 0,416       | BH/DXR                    | 1,412       | BH/DXR                         | 1,28        |
| BH/DXR                       | 0,423       | BH/DXR                    | 0,682       | BH/DXR                         | 0,85        |
| BH/DXR                       | 0,305       | BH/DXR                    | 0,364       | BH/DXR                         | 0,88        |
| BH/DXR                       | 0,194       | BH/DXR                    | 0,25        | BH/DXR                         | 0,84        |
| BH/DXR                       | 0,362       | BH/DXR                    | 0,667       | BH/DXR                         | 1,02        |
| BH/DXR                       | 0,355       | BH/DXR                    | 0,735       | BH/DXR                         | 1,11        |

| <b>D: nephrin mRNA levels</b> |                 | <b>F: p47phox mRNA levels</b> |                 |
|-------------------------------|-----------------|-------------------------------|-----------------|
| Animal ID                     | Rel. Expression | Animal ID                     | Rel. Expression |
| CD/c                          | 1,1487          | CD/c                          | 0,8939          |
| CD/c                          | 1,3566          | CD/c                          | 1,3736          |
| CD/c                          | 0,9075          | CD/c                          | 0,7727          |
| CD/c                          | 1,1892          | CD/c                          | 0,9598          |
| CD/DXR                        | 0,5946          | CD/DXR                        | 2,4014          |
| CD/DXR                        | 0,7371          | CD/DXR                        | 1,6898          |
| CD/DXR                        | 0,2449          | CD/DXR                        | 2,4291          |
| CD/DXR                        | 0,7423          | CD/DXR                        | 2,8717          |
| CD/DXR                        | 0,6417          | CD/DXR                        | 4,0102          |
| CD/DXR                        | 0,5285          | CD/DXR                        | 4,7314          |
| CD/DXR                        | 0,4830          | CD/DXR                        | 5,9876          |
| CD/DXR                        | 0,8467          | CD/DXR                        | 5,8697          |
| BH/c                          | 1,0943          | BH/c                          | 1,0657          |
| BH/c                          | 0,9727          | BH/c                          | 0,8786          |
| BH/c                          | 1,0000          | BH/c                          | 0,8990          |
| BH/c                          | 1,0943          | BH/c                          | 1,1568          |
| BH/DXR                        | 0,9395          | BH/DXR                        | 2,3003          |
| BH/DXR                        | 0,8645          | BH/DXR                        | 1,5930          |
| BH/DXR                        | 1,1019          | BH/DXR                        | 1,6313          |
| BH/DXR                        | 1,2058          | BH/DXR                        | 1,3116          |
| BH/DXR                        | 0,6598          | BH/DXR                        | 2,2270          |
| BH/DXR                        | 0,7371          | BH/DXR                        | 2,5184          |
| BH/DXR                        | 0,7022          | BH/DXR                        | 2,1724          |
| BH/DXR                        | 0,9931          | BH/DXR                        | 1,6478          |

| <b>A: TGF-<math>\beta</math>1 mRNA levels</b> |                 | <b>B: CTGF mRNA levels</b> |                 |
|-----------------------------------------------|-----------------|----------------------------|-----------------|
| Animal ID                                     | Rel. Expression | Animal ID                  | Rel. Expression |
| CD/c                                          | 0,9948          | CD/c                       | 1,3381          |
| CD/c                                          | 0,7471          | CD/c                       | 0,9584          |
| CD/c                                          | 1,4472          | CD/c                       | 1,0499          |
| CD/c                                          | 0,8110          | CD/c                       | 0,6536          |
| CD/DXR                                        | 4,4100          | CD/DXR                     | 2,6729          |
| CD/DXR                                        | 2,0923          | CD/DXR                     | 1,5929          |
| CD/DXR                                        | 5,0135          | CD/DXR                     | 3,2987          |
| CD/DXR                                        | 3,0776          | CD/DXR                     | 1,1143          |
| CD/DXR                                        | 5,3913          | CD/DXR                     | 2,8870          |
| CD/DXR                                        | 5,7357          | CD/DXR                     | 4,1953          |
| CD/DXR                                        | 8,6292          | CD/DXR                     | 5,4118          |
| CD/DXR                                        | 6,9101          | CD/DXR                     | 5,4071          |
| BH/c                                          | 0,8762          | BH/c                       | 0,5341          |
| BH/c                                          | 0,7899          | BH/c                       | 0,7790          |
| BH/c                                          | 1,1983          | BH/c                       | 1,1951          |
| BH/c                                          | 1,1356          | BH/c                       | 1,4918          |
| BH/DXR                                        | 2,7330          | BH/DXR                     | 0,6724          |
| BH/DXR                                        | 0,9580          | BH/DXR                     | 1,0199          |
| BH/DXR                                        | 1,1171          | BH/DXR                     | 0,3927          |
| BH/DXR                                        | 0,9962          | BH/DXR                     | 0,5848          |
| BH/DXR                                        | 1,0873          | BH/DXR                     | 0,5269          |
| BH/DXR                                        | 1,0956          | BH/DXR                     | 0,5053          |
| BH/DXR                                        | 1,9162          | BH/DXR                     | 1,3112          |
| BH/DXR                                        | 3,5750          | BH/DXR                     | 0,5708          |

**L: Fibronectin immunohistochemistry**

**J: Sirius red staining**

| Animal ID | Score value | Animal ID | Score value |
|-----------|-------------|-----------|-------------|
| CD/c      | 5,011       | CD/c      | 4,3238      |
| CD/c      | 4,908       | CD/c      | 1,9925      |
| CD/c      | 5,782       | CD/c      | 3,7660      |
| CD/c      | 5,816       | CD/c      | 4,7968      |
| CD/DXR    | 8,5         | CD/DXR    | 25,6297     |
| CD/DXR    | 10,028      | CD/DXR    | 33,2227     |
| CD/DXR    | 6,043       | CD/DXR    | 37,6520     |
| CD/DXR    | 5,656       | CD/DXR    | 22,5253     |
| CD/DXR    | 7,187       | CD/DXR    | 16,9033     |
| CD/DXR    | 10,913      | CD/DXR    | 22,6795     |
| CD/DXR    | 11,395      | CD/DXR    | 17,2925     |
| CD/DXR    | 7,38        | CD/DXR    | 16,4887     |
| BH/c      | 5,088       | BH/c      | 2,1267      |
| BH/c      | 4,269       | BH/c      | 2,0167      |
| BH/c      | 4,974       | BH/c      | 2,1543      |
| BH/c      | 4,767       | BH/c      | 1,5483      |
| BH/c      | 6,294       | BH/c      | 3,2860      |
| BH/DXR    | 4,23        | BH/DXR    | 9,6307      |
| BH/DXR    | 5,067       | BH/DXR    | 14,9730     |
| BH/DXR    | 4,789       | BH/DXR    | 7,4595      |
| BH/DXR    | 6,34        | BH/DXR    | 8,1765      |
| BH/DXR    | 5,168       | BH/DXR    | 11,9640     |
| BH/DXR    | 6,724       | BH/DXR    | 3,2030      |
| BH/DXR    | 8,34        | BH/DXR    | 8,6160      |
| BH/DXR    | 7,11        | BH/DXR    | 16,6300     |
| BH/DXR    | 6,218       | BH/DXR    | 17,3910     |
| BH/DXR    | 6,43        | BH/DXR    | 8,7174      |



| <b>C: COL1A1 mRNA levels</b> |                 | <b>E: MCP-1 mRNA levels</b> |                 | <b>G: p91phox mRNA levels</b> |                 |
|------------------------------|-----------------|-----------------------------|-----------------|-------------------------------|-----------------|
| Animal ID                    | Rel. Expression | Animal ID                   | Rel. Expression | Animal ID                     | Rel. Expression |
| CD/c                         | 0,6799          | CD/c                        | 0,8599          | CD/c                          | 0,3962          |
| CD/c                         | 0,4336          | CD/c                        | 0,9025          | CD/c                          | 0,7658          |
| CD/c                         | 0,7390          | CD/c                        | 1,0048          | CD/c                          | 1,1540          |
| CD/c                         | 2,1475          | CD/c                        | 1,2328          | CD/c                          | 1,6841          |
| CD/DXR                       | 13,4632         | CD/DXR                      | 10,1546         | CD/DXR                        | 2,2691          |
| CD/DXR                       | 11,3633         | CD/DXR                      | 3,5263          | CD/DXR                        | 5,6451          |
| CD/DXR                       | 15,2286         | CD/DXR                      | 6,6650          | CD/DXR                        | 10,2238         |
| CD/DXR                       | 16,9505         | CD/DXR                      | 4,5189          | CD/DXR                        | 7,0318          |
| CD/DXR                       | 19,5712         | CD/DXR                      | 10,5057         | CD/DXR                        | 11,3442         |
| CD/DXR                       | 26,6740         | CD/DXR                      | 9,4225          | CD/DXR                        | 12,1854         |
| CD/DXR                       | 30,7756         | CD/DXR                      | 12,1021         | CD/DXR                        | 12,0952         |
| CD/DXR                       | 25,0576         | CD/DXR                      | 9,7915          | CD/DXR                        | 12,2678         |
| BH/c                         | 1,1609          | BH/c                        | 0,5757          | BH/c                          | 1,3664          |
| BH/c                         | 0,8085          | BH/c                        | 0,9859          | BH/c                          | 0,8964          |
| BH/c                         | 1,1795          | BH/c                        | 0,9527          | BH/c                          | 1,1007          |
| BH/c                         | 0,8510          | BH/c                        | 1,4857          | BH/c                          | 0,6365          |
| BH/DXR                       | 3,7871          | BH/DXR                      | 2,5688          | BH/DXR                        | 1,3275          |
| BH/DXR                       | 2,4950          | BH/DXR                      | 2,2583          | BH/DXR                        | 1,9489          |
| BH/DXR                       | 4,0362          | BH/DXR                      | 4,8737          | BH/DXR                        | 1,8694          |
| BH/DXR                       | 1,9650          | BH/DXR                      | 2,3242          | BH/DXR                        | 2,9488          |
| BH/DXR                       | 8,9460          | BH/DXR                      | 3,2348          | BH/DXR                        | 1,5000          |
| BH/DXR                       | 2,1653          | BH/DXR                      | 3,2400          | BH/DXR                        | 2,1397          |
| BH/DXR                       | 4,8373          | BH/DXR                      | 3,8614          | BH/DXR                        | 3,5987          |
| BH/DXR                       | 6,3814          | BH/DXR                      | 3,1556          | BH/DXR                        | 3,0479          |

Fibronectin immunohistochemistry

BH/c:

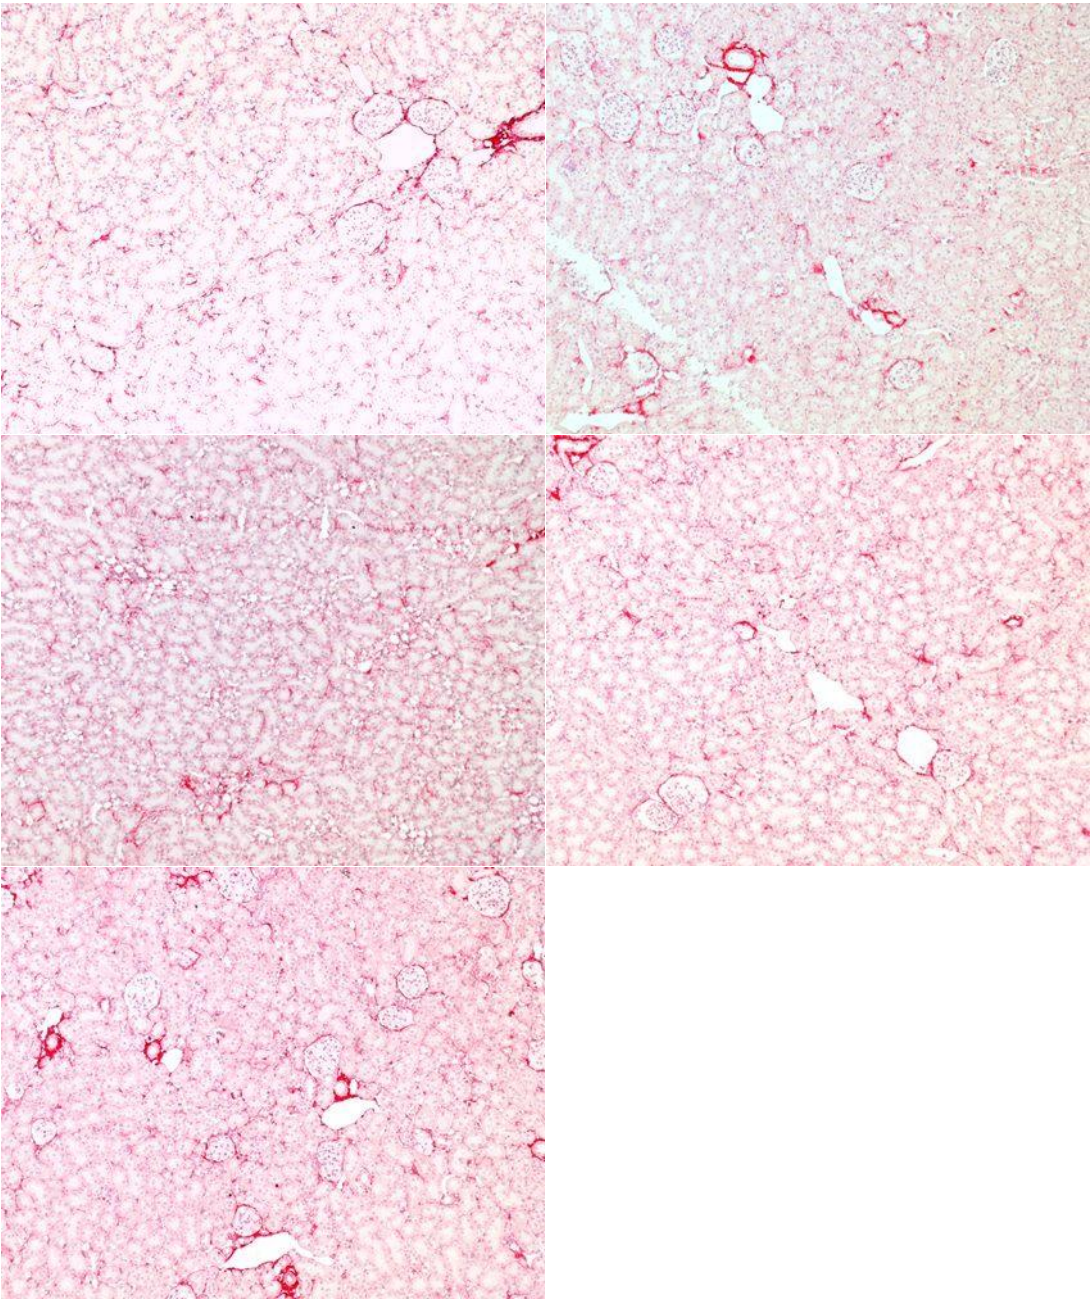

CD/c:

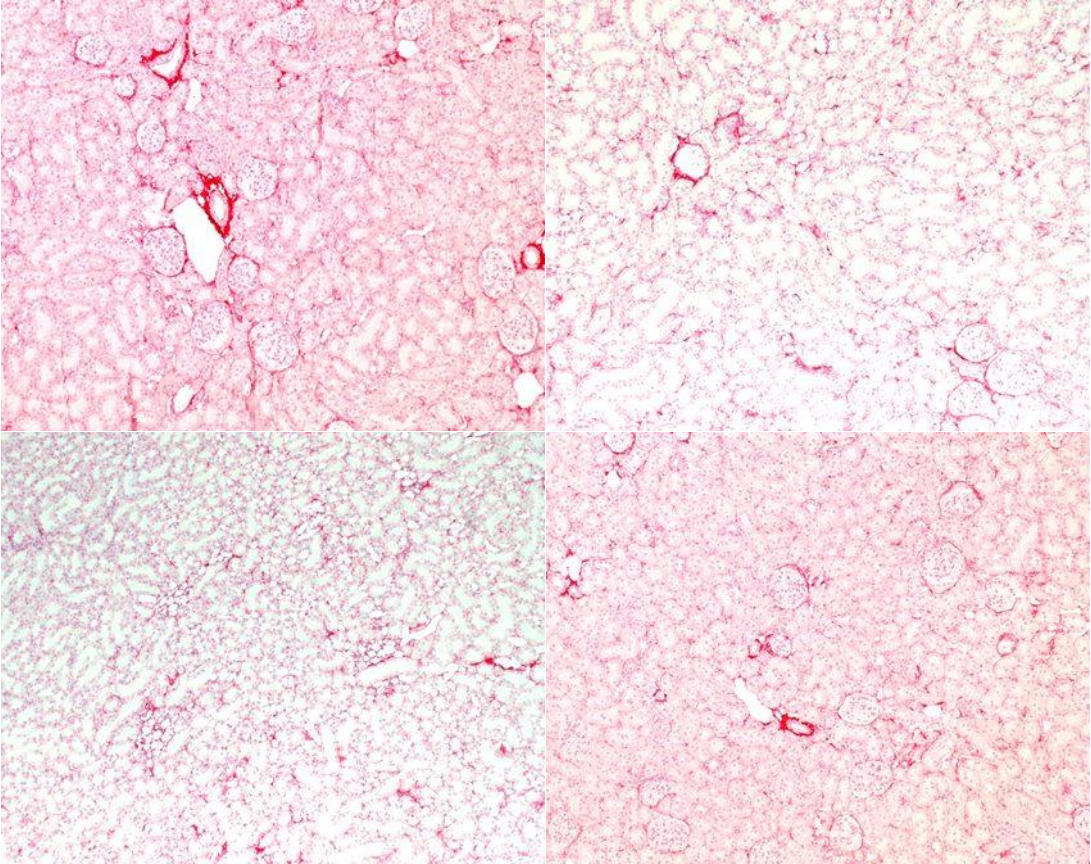

BH/DXR:

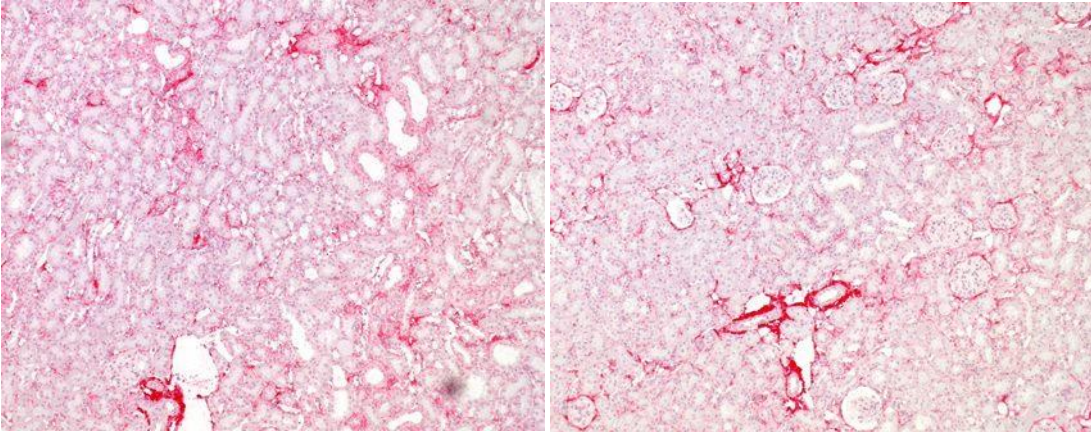

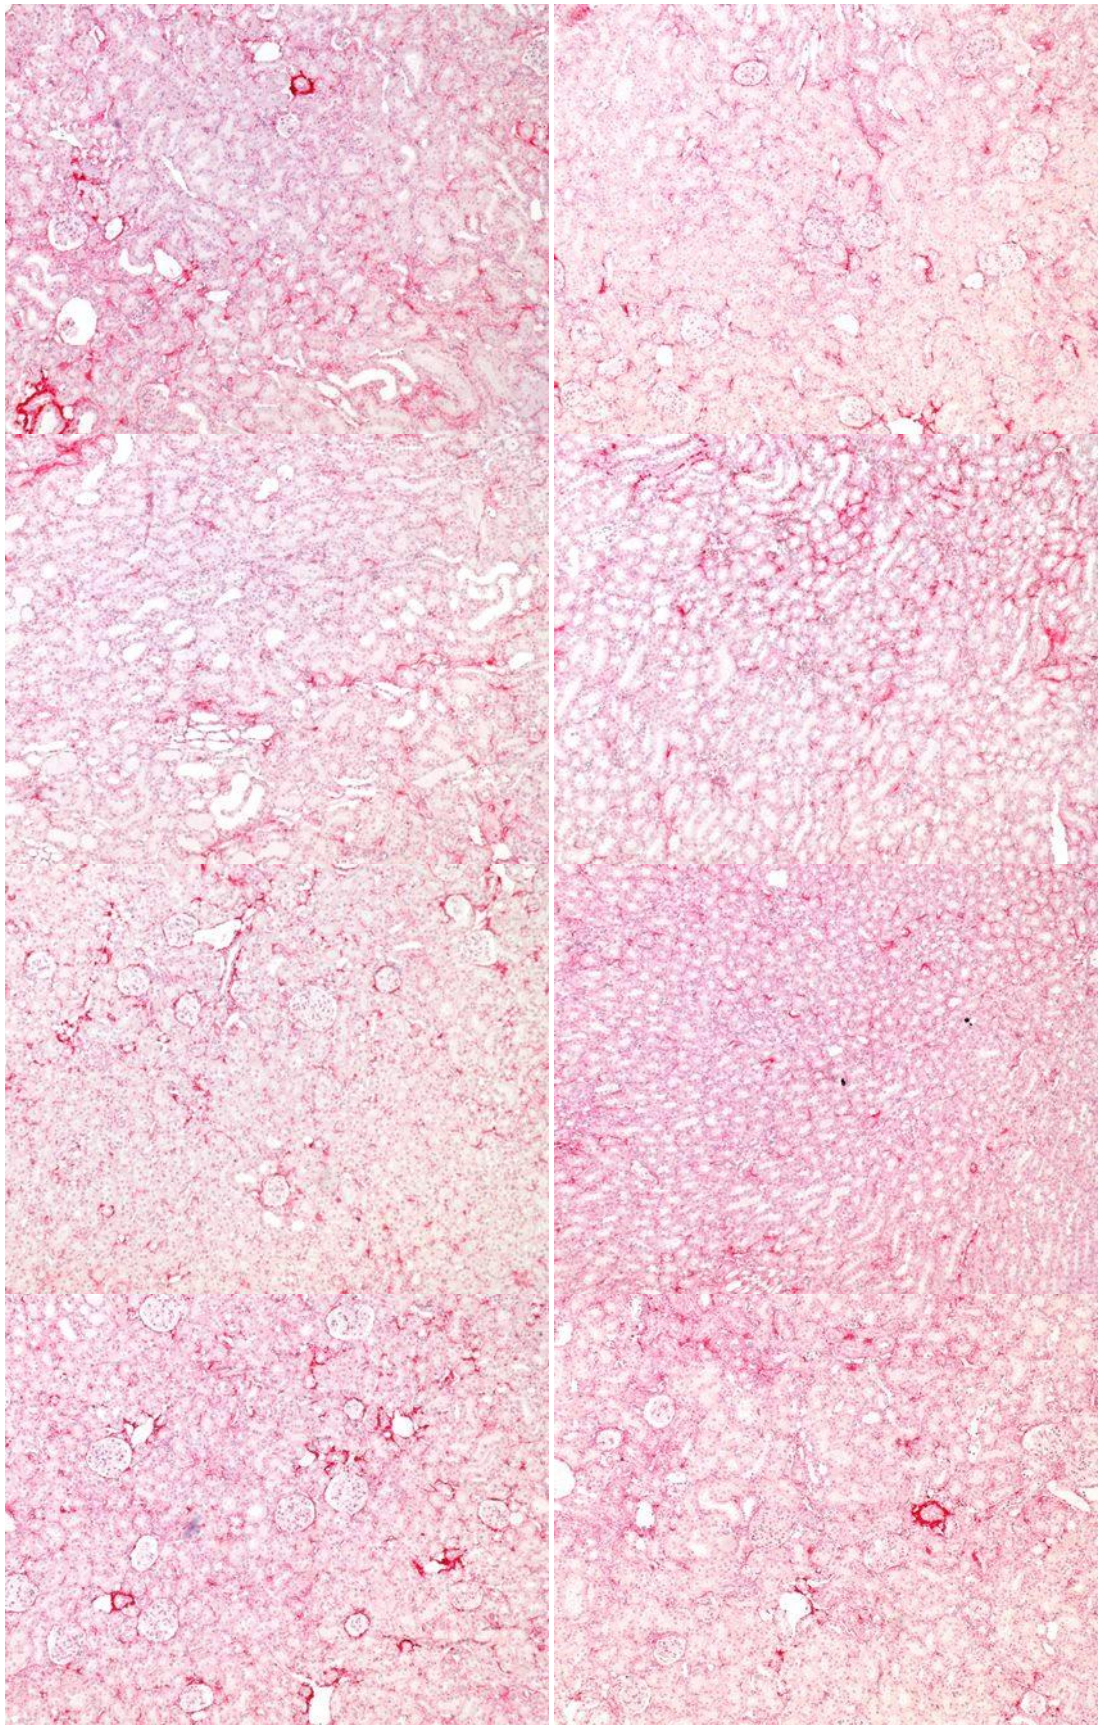

CD/DXR:

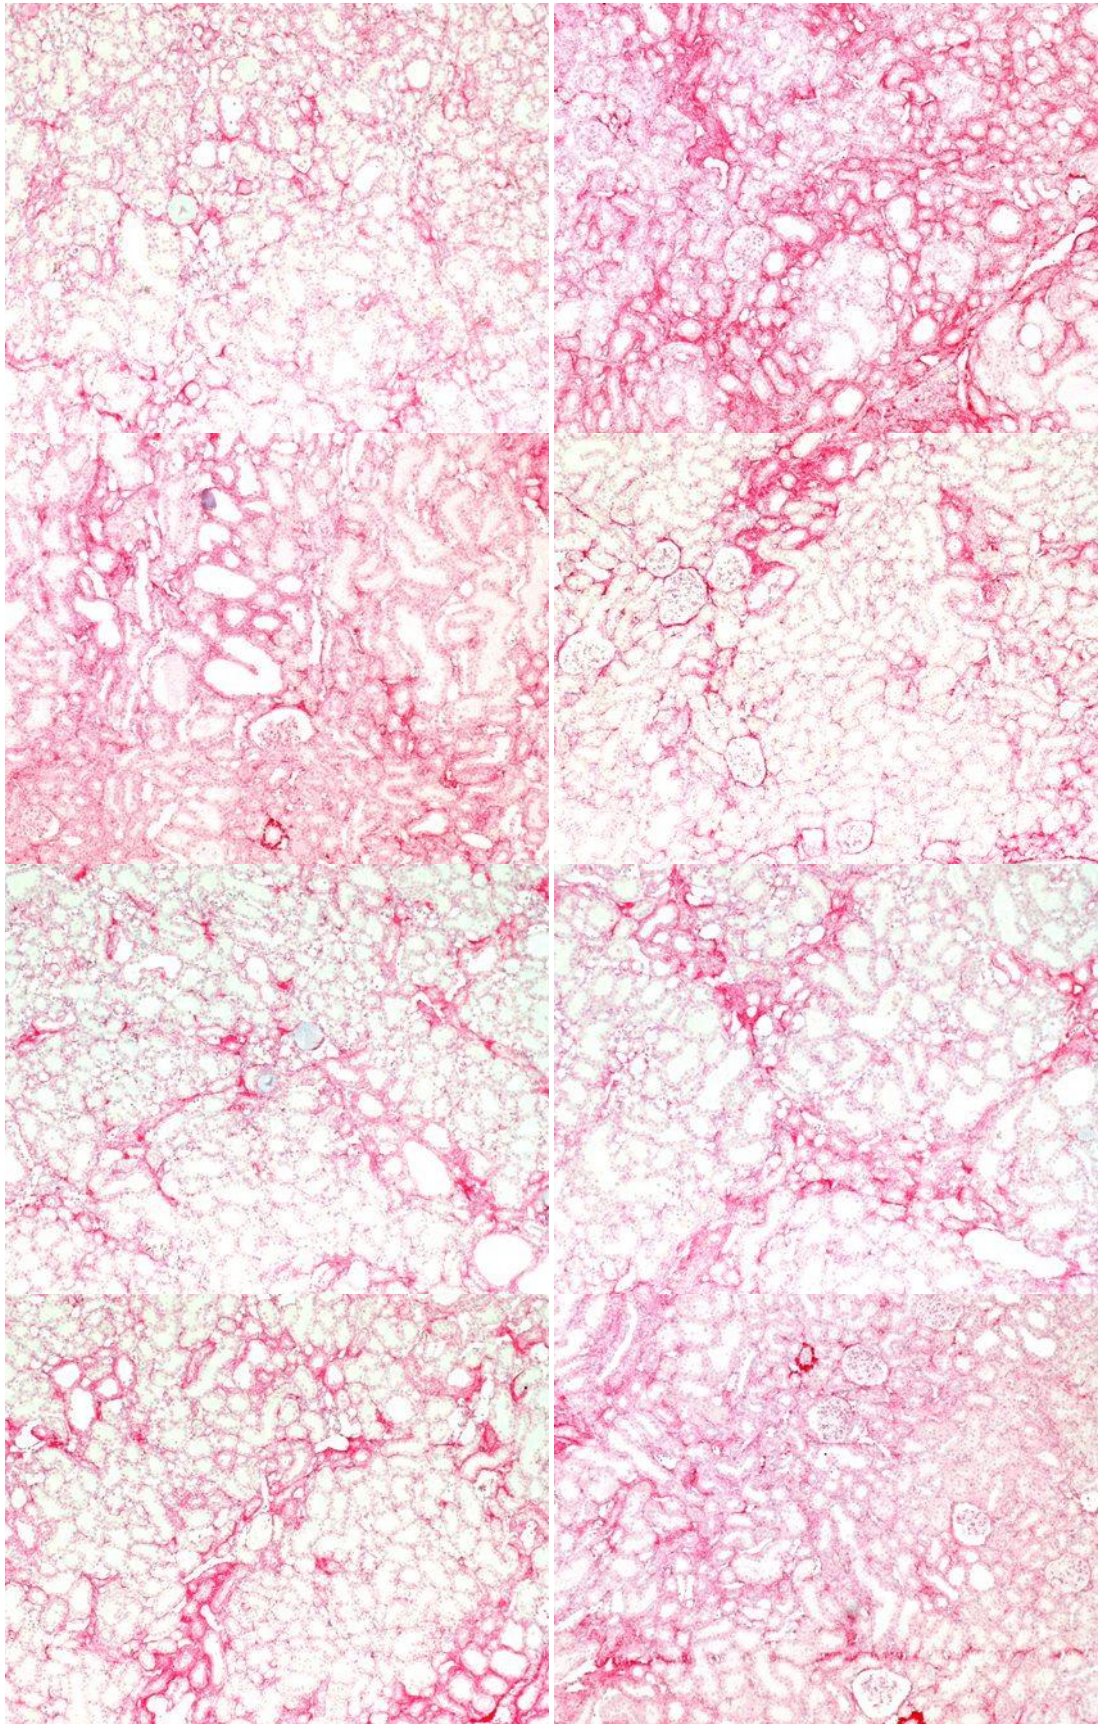

Sirius red staining

BH/c:

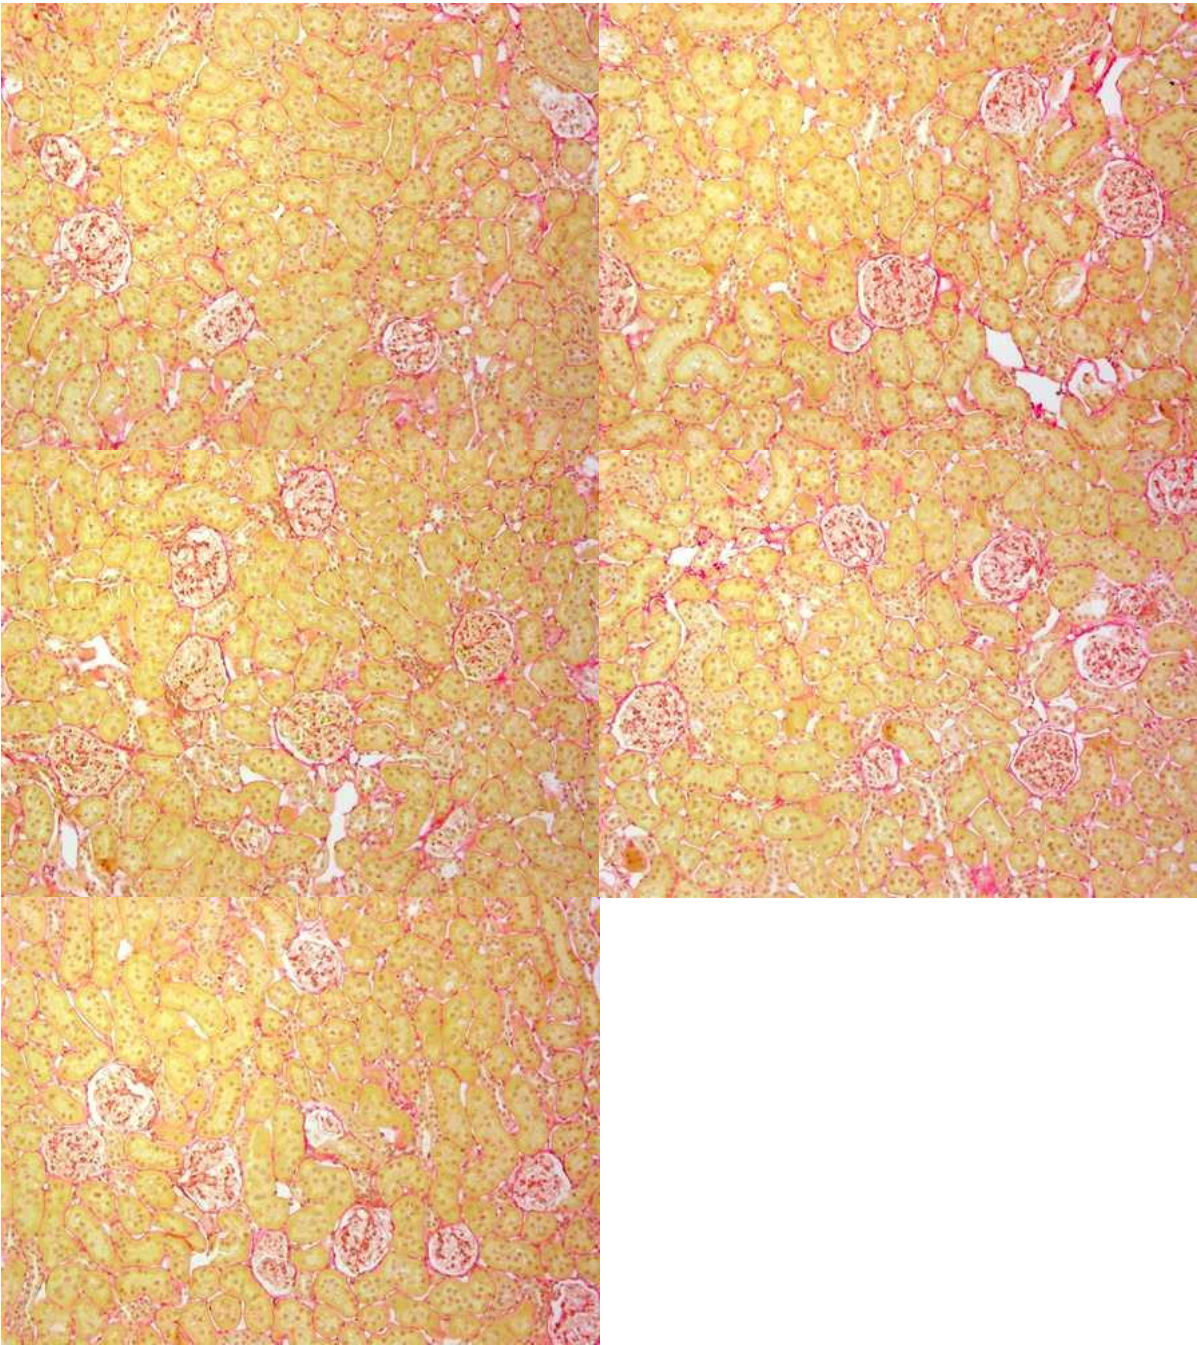

CD/c:

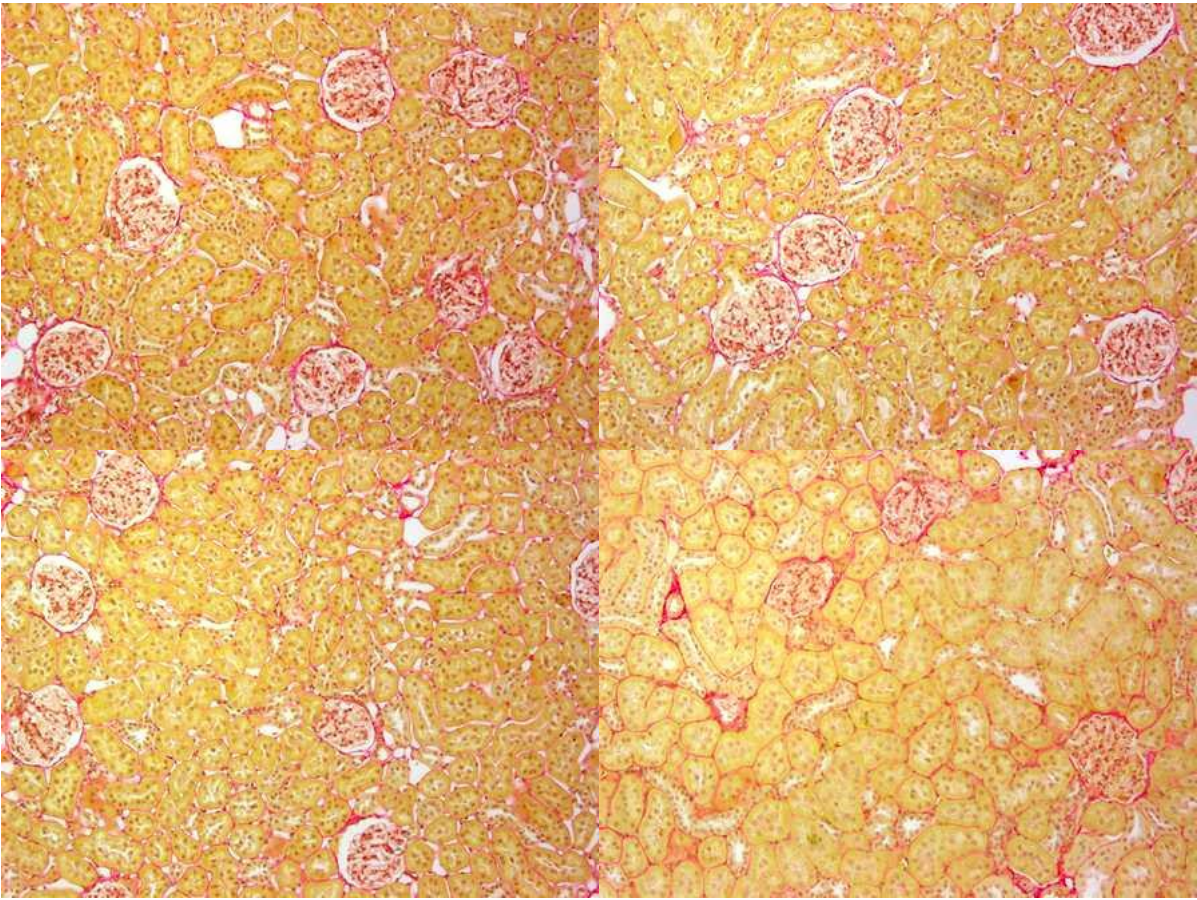

BH/DXR:

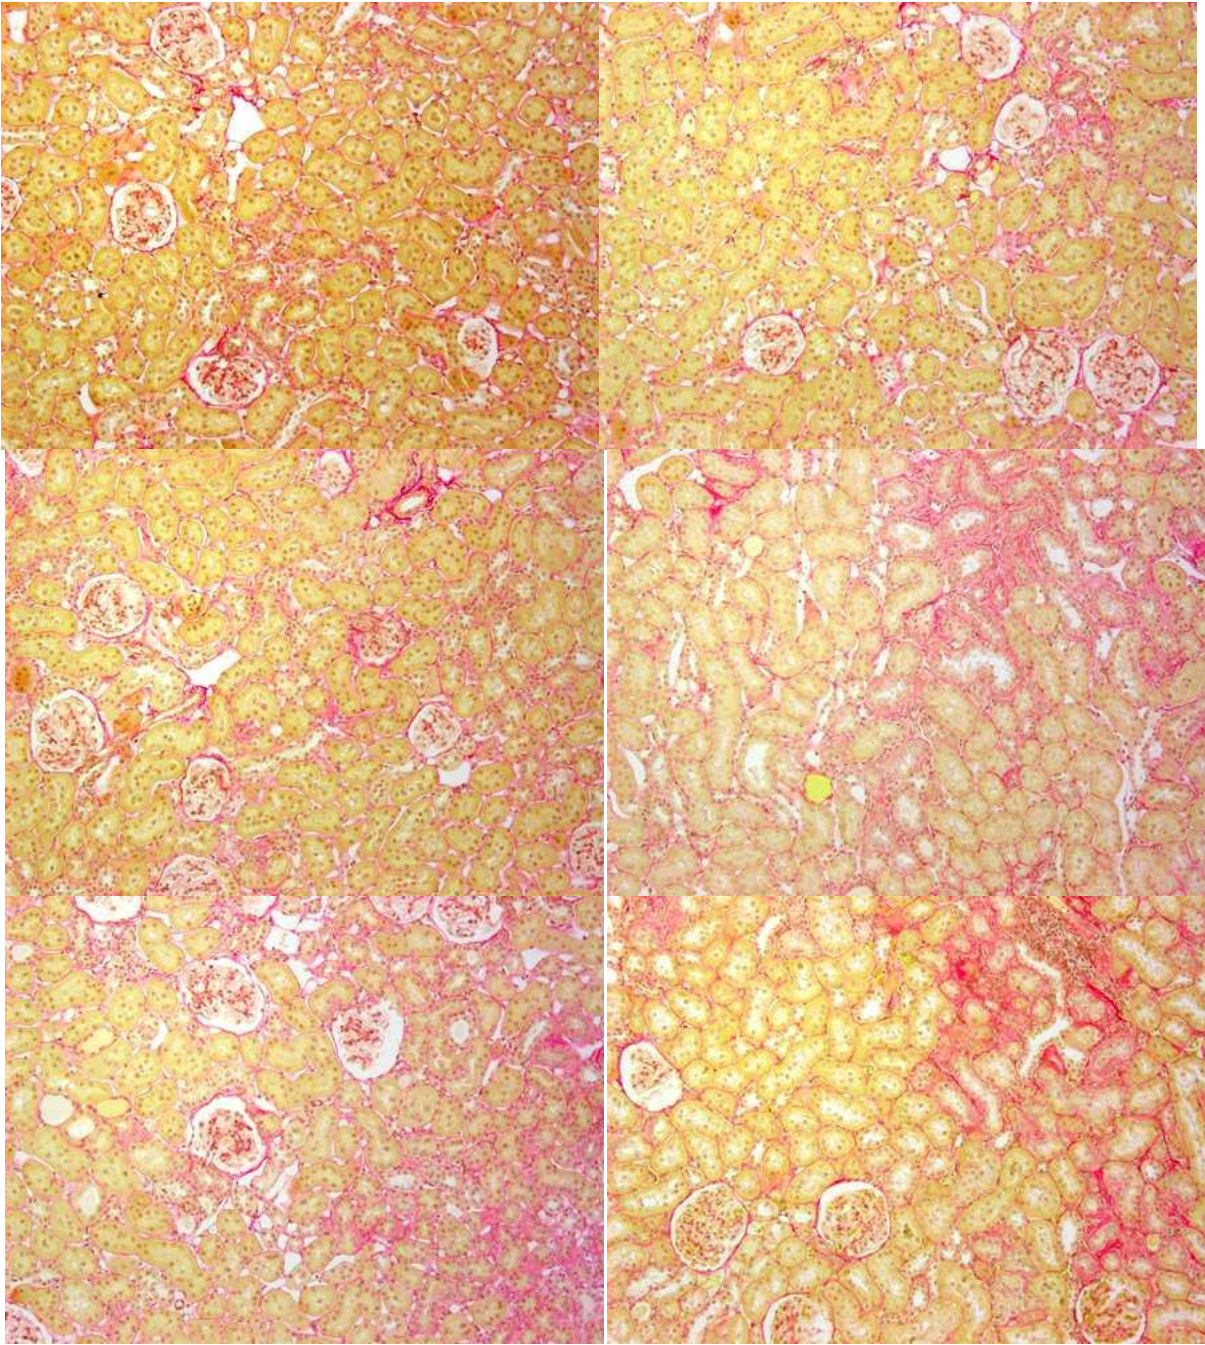



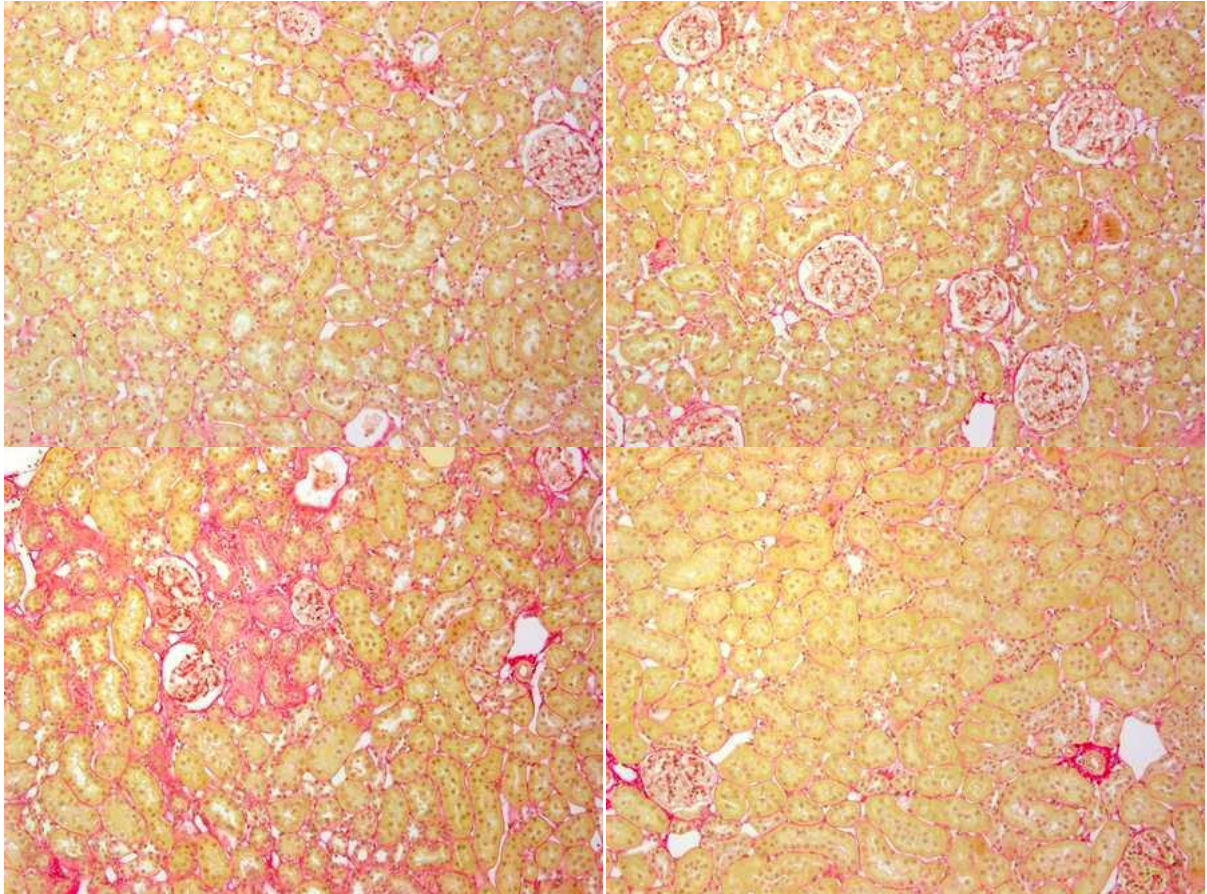

CD/DXR:

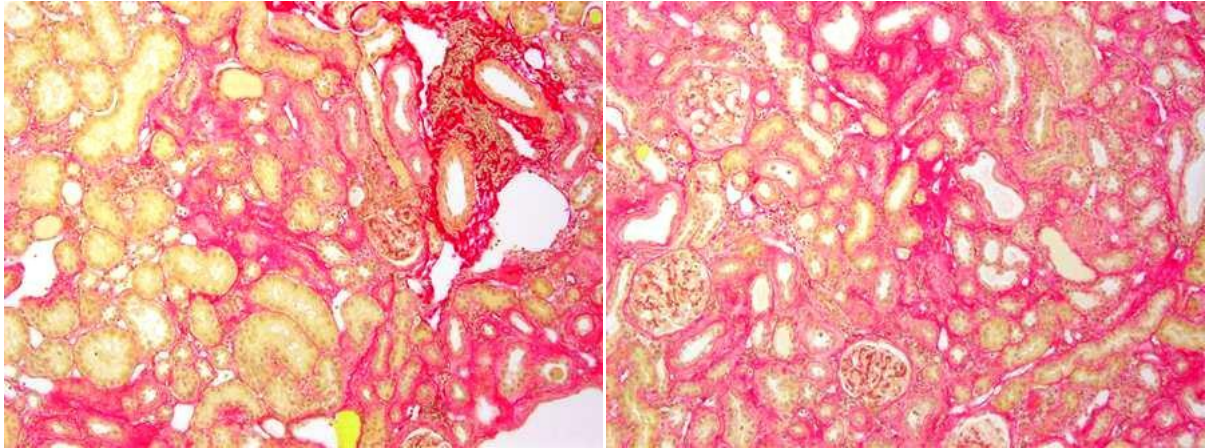

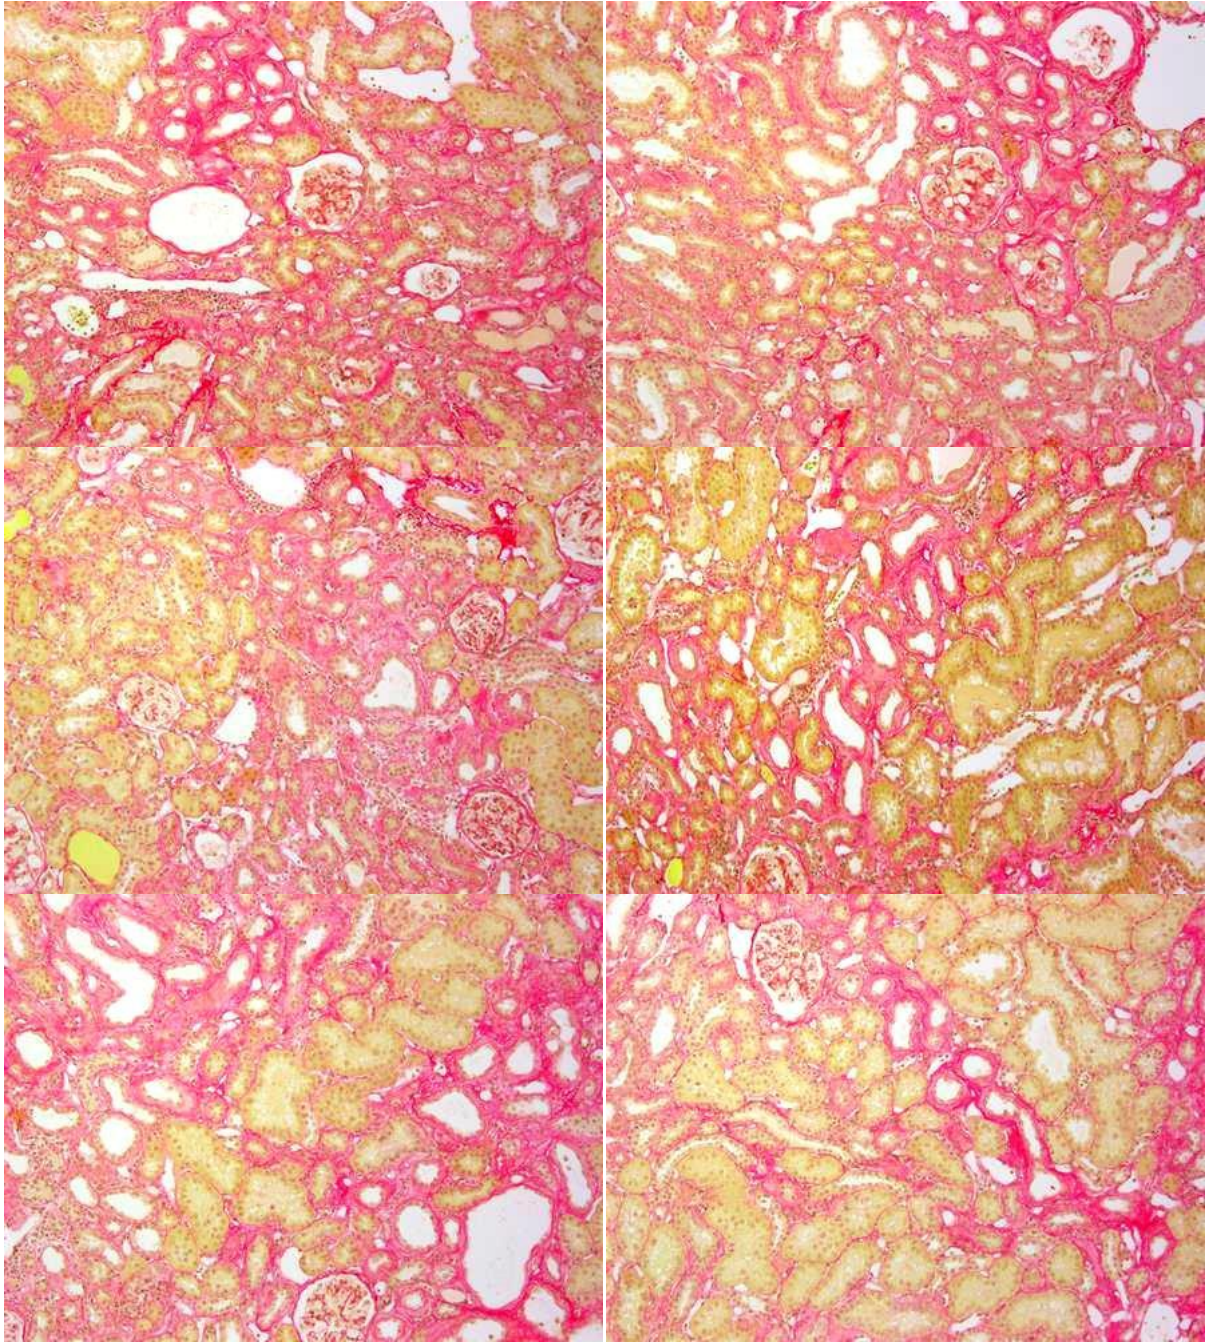

Periodic Acid Schiff (PAS) staining

BH/c:

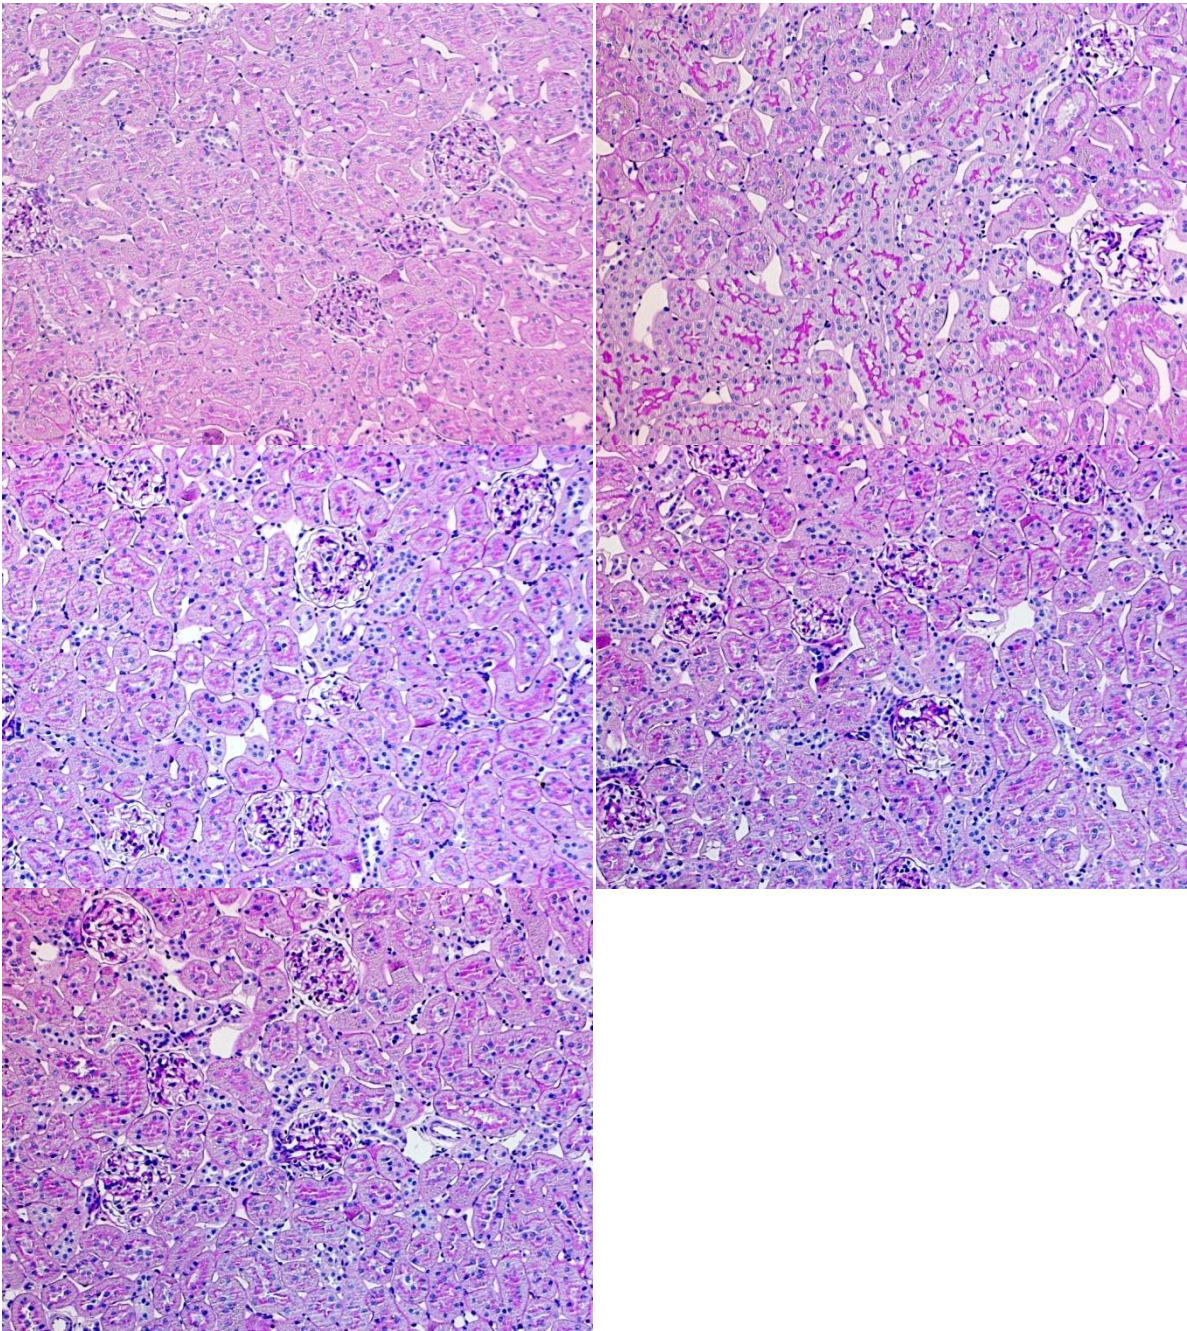

CD/c:

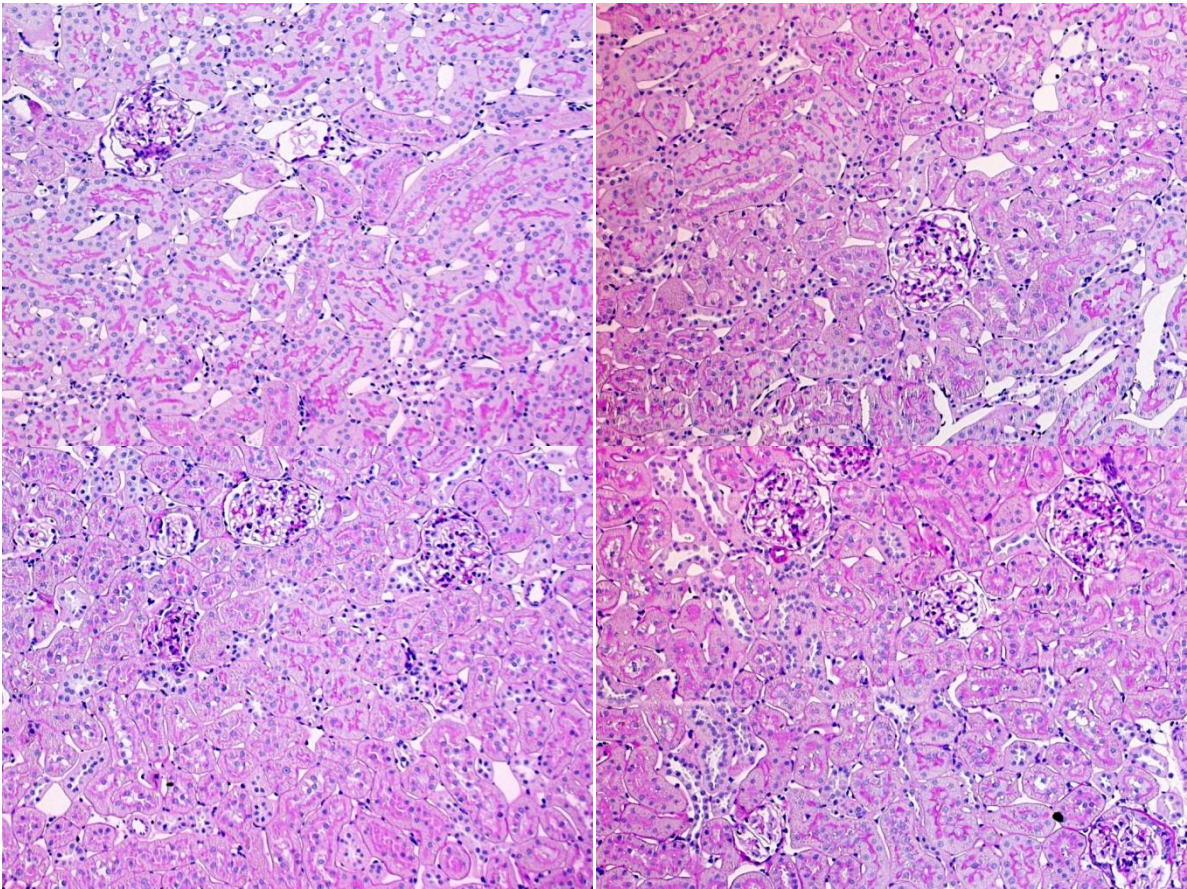

BH/DXR:

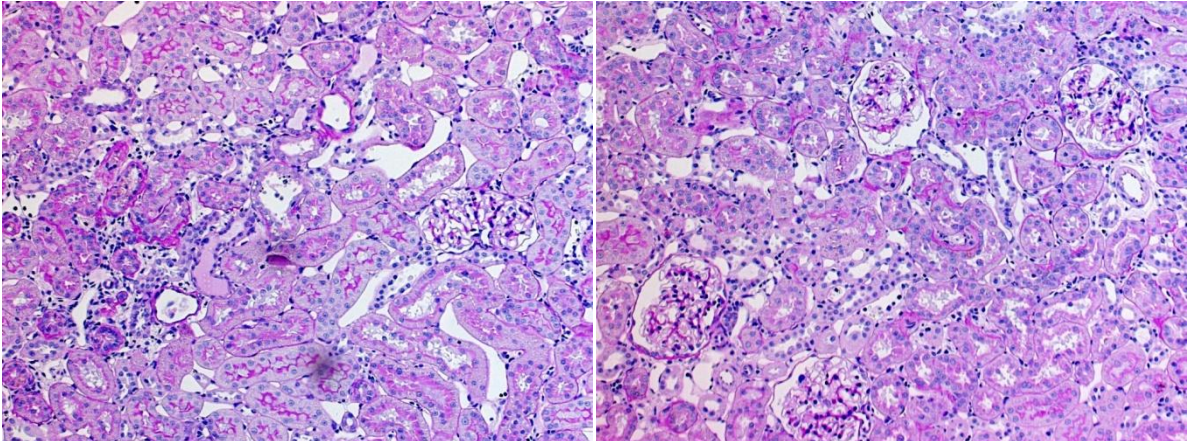

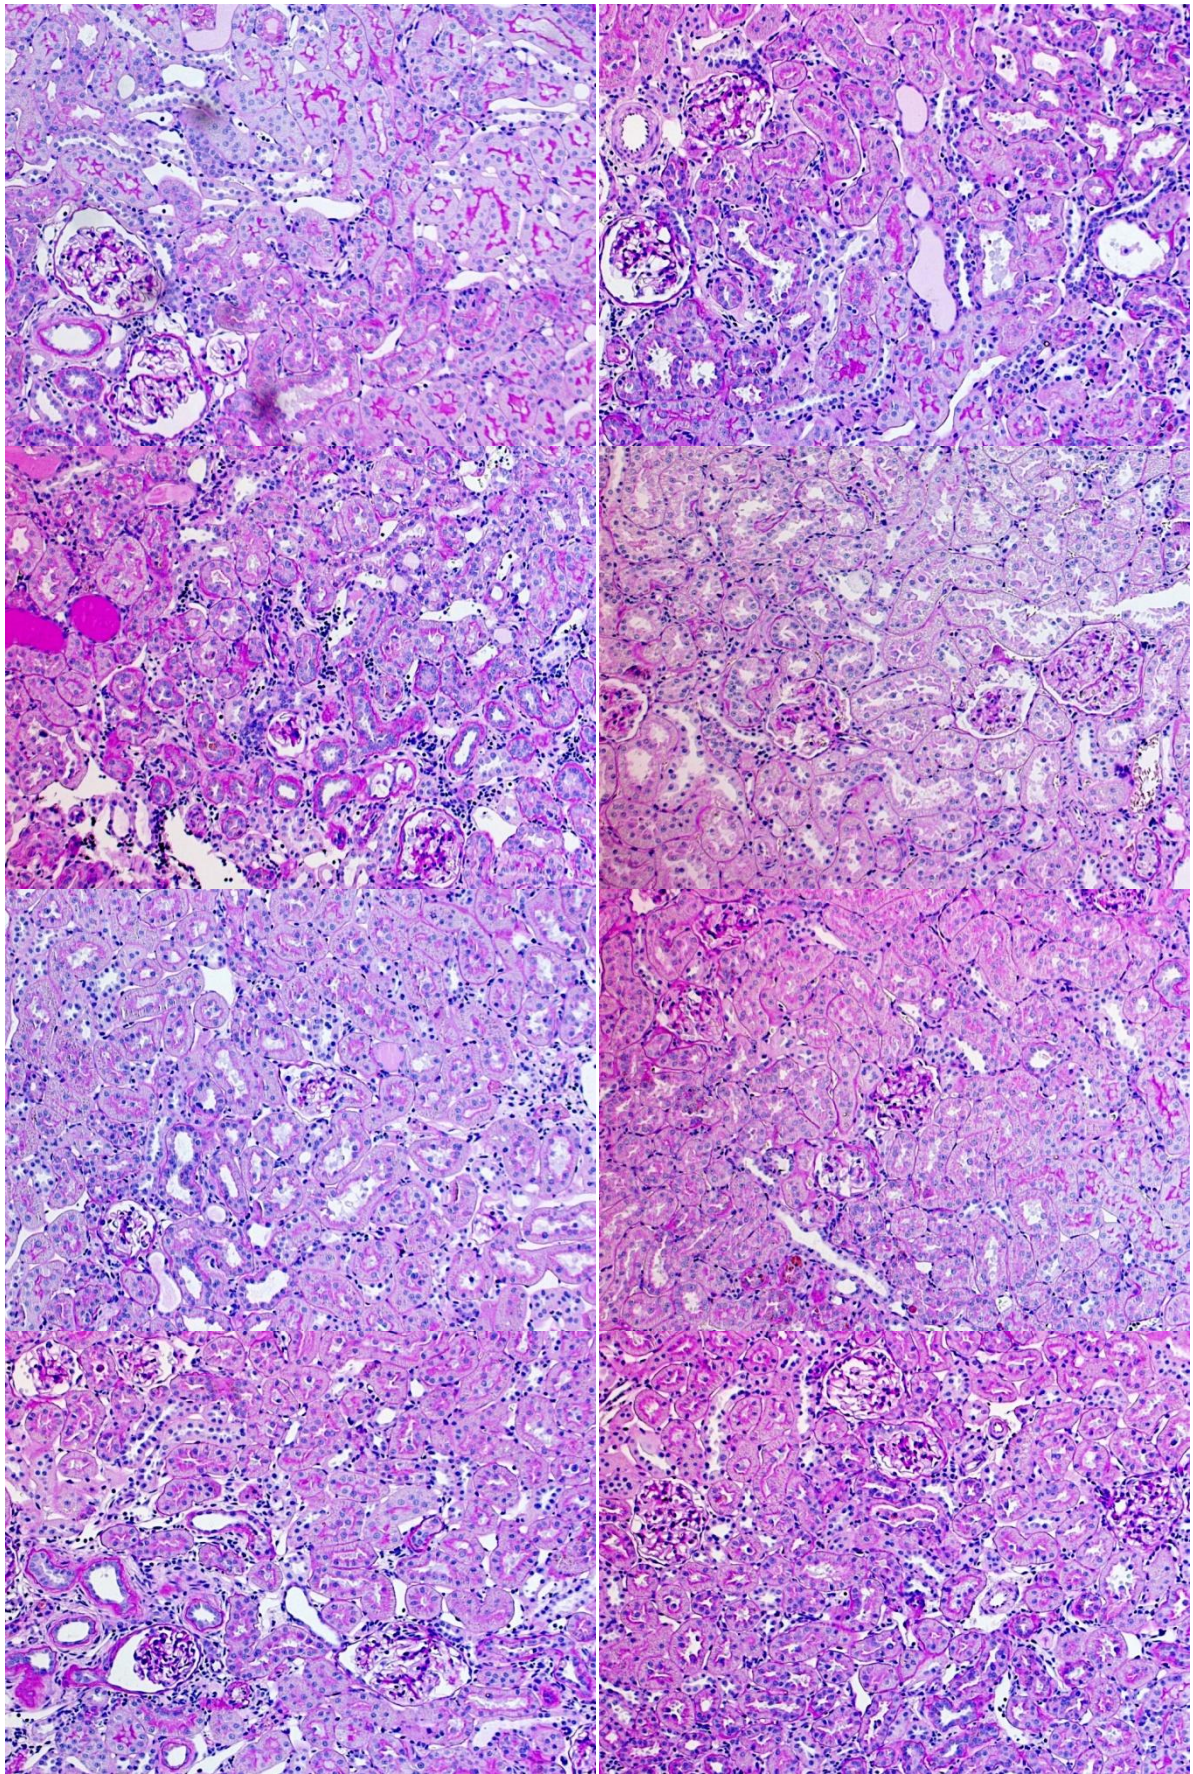

CD/DXR:

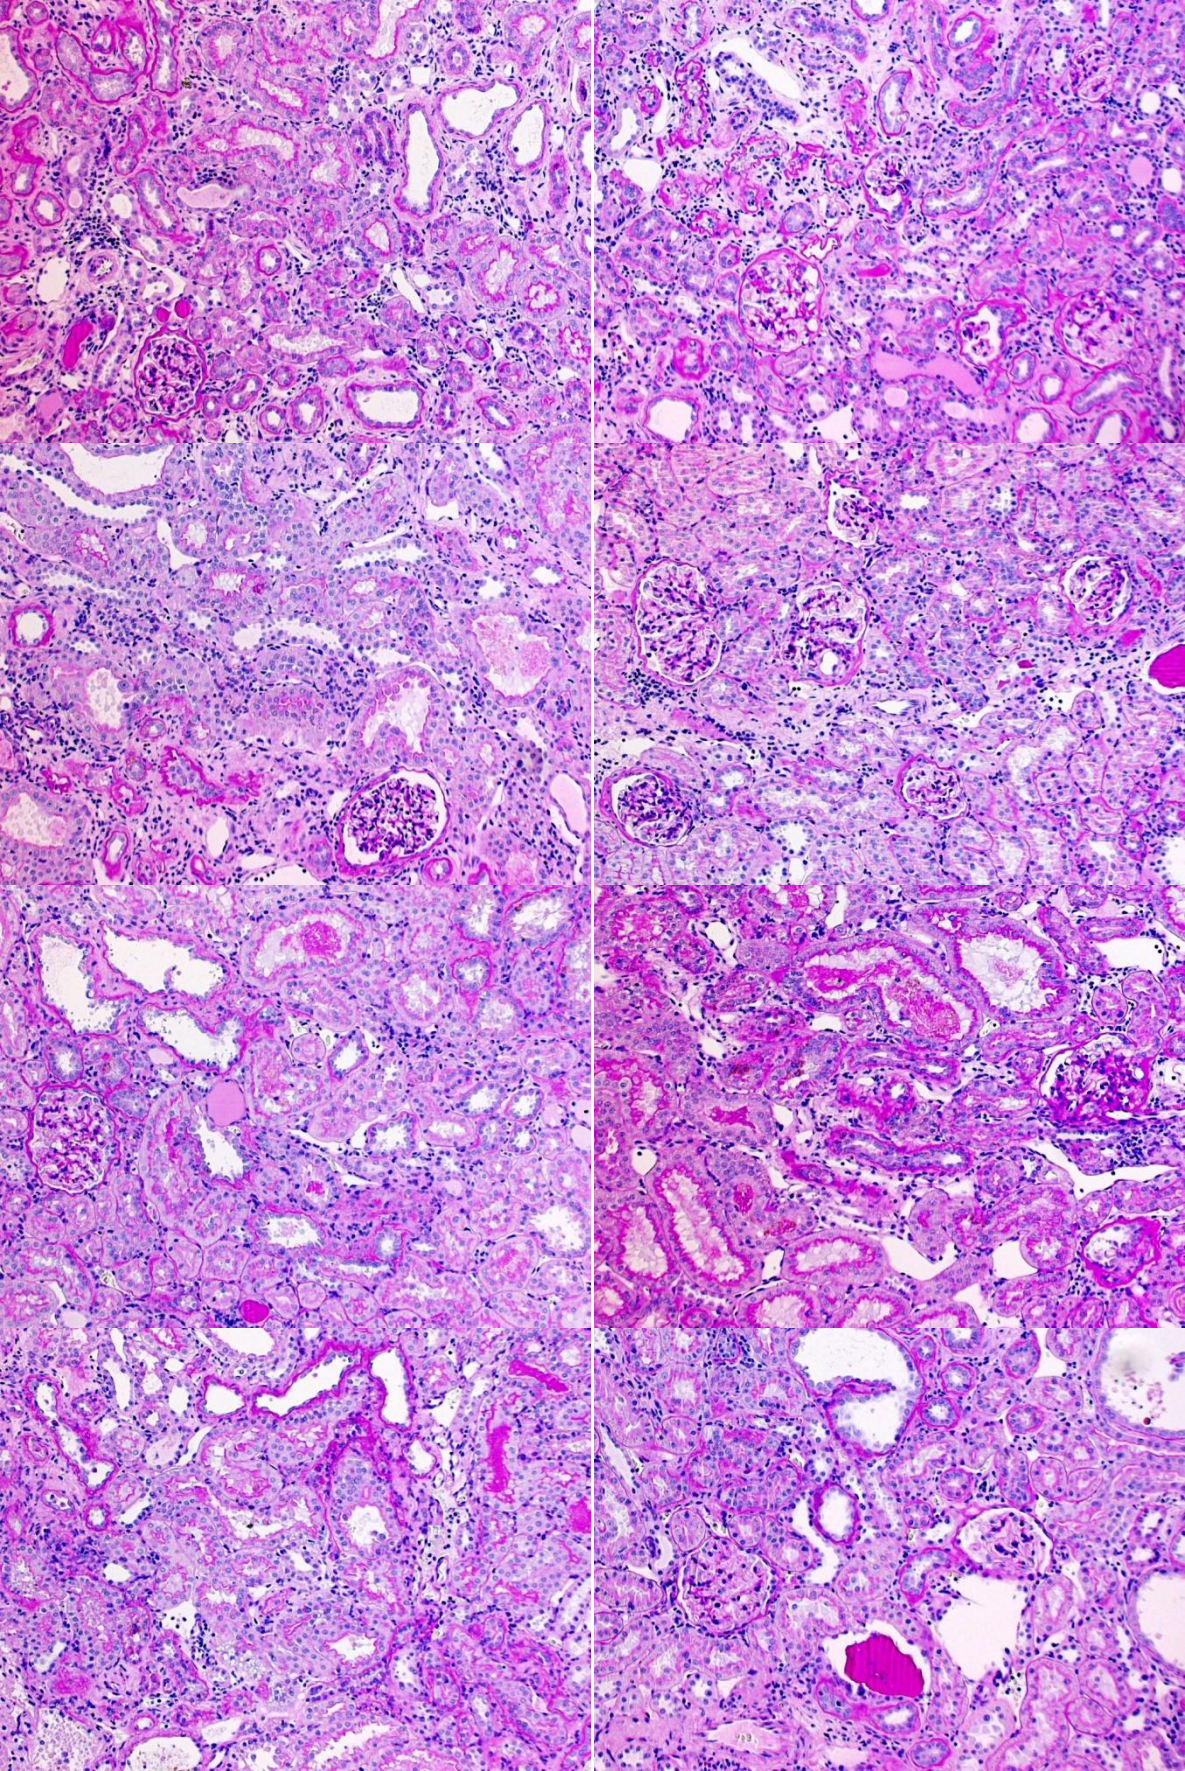

Hematoxylin eosin staining

BH/c:

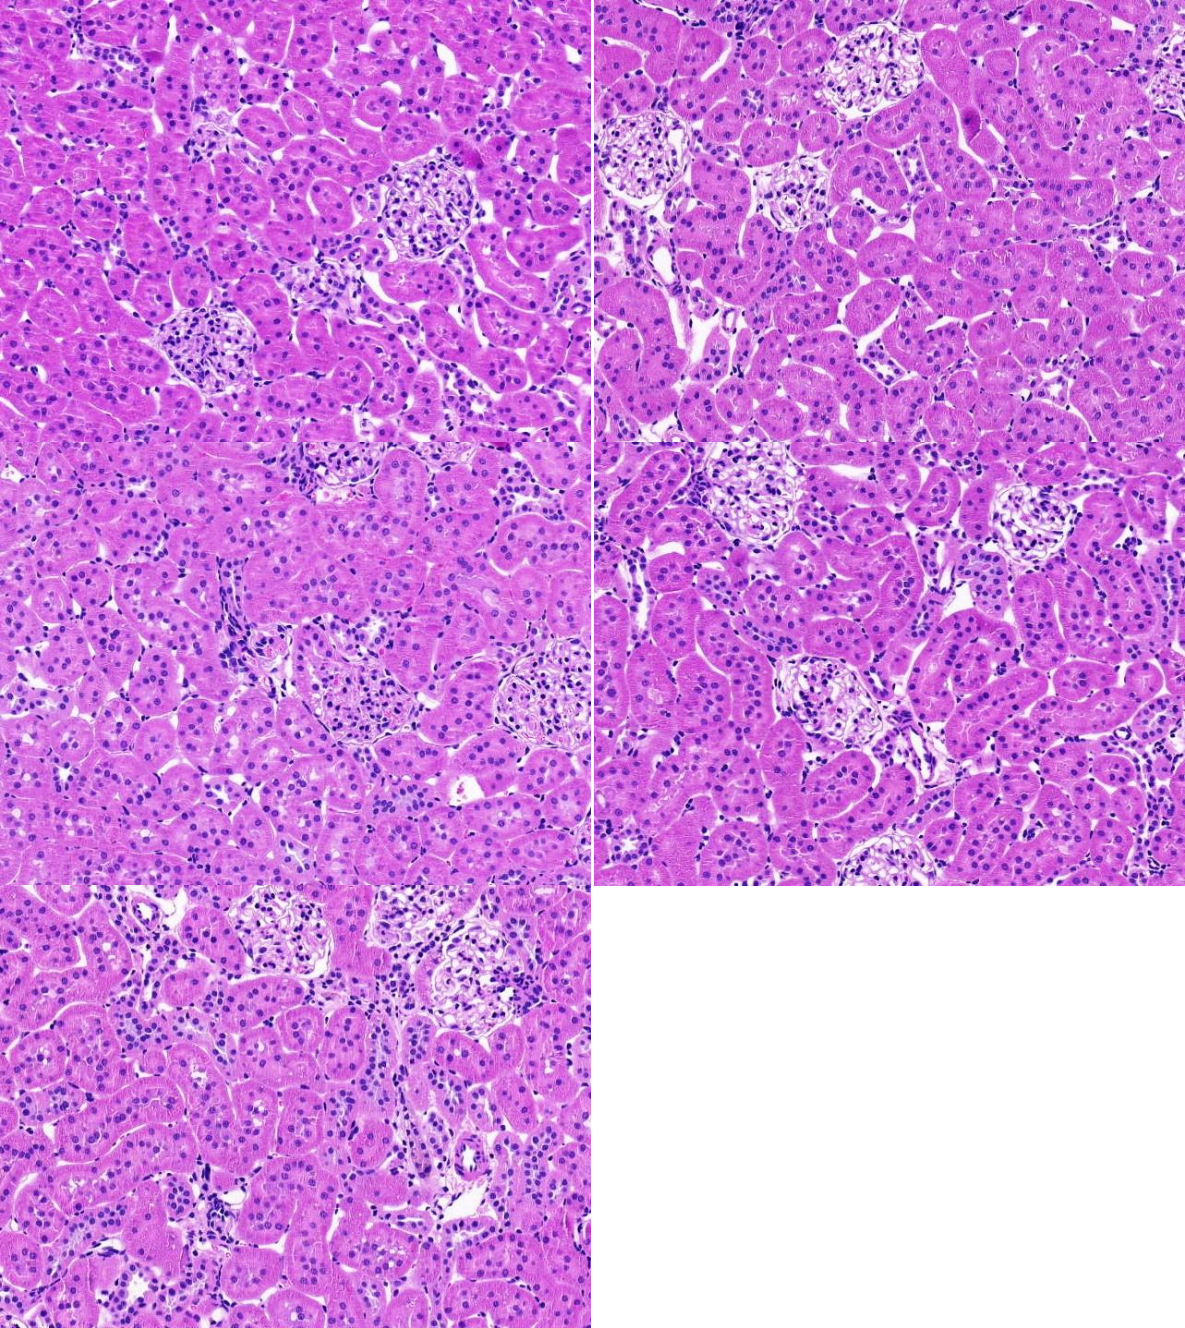

CD/c:

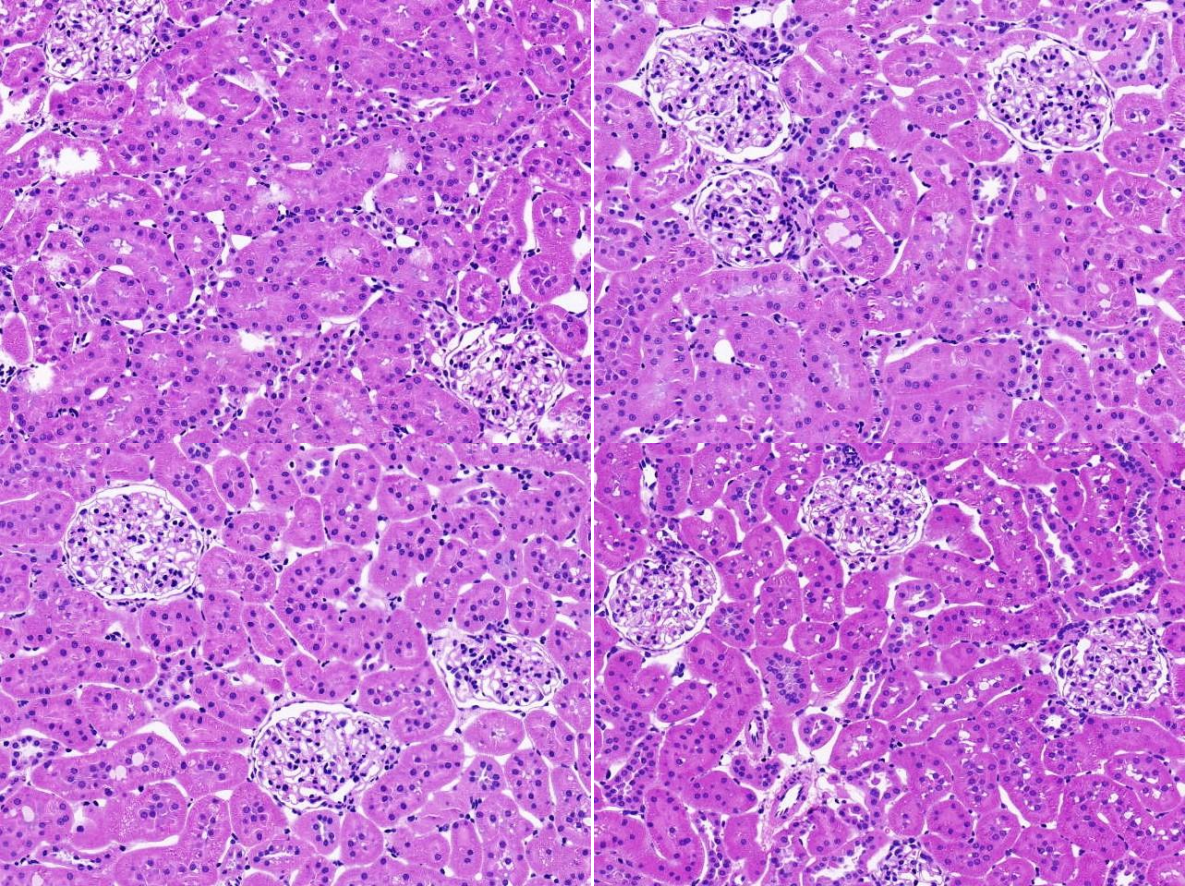

BH/DXR:

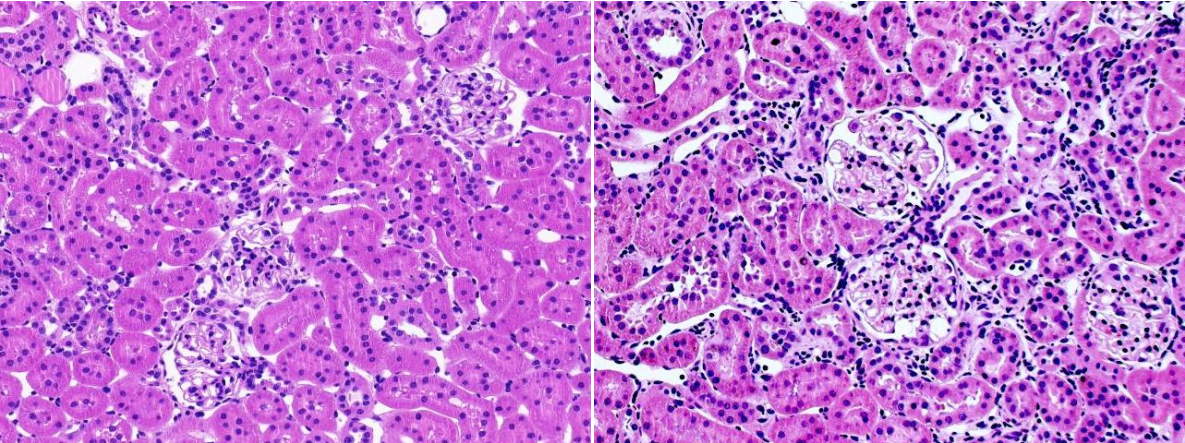



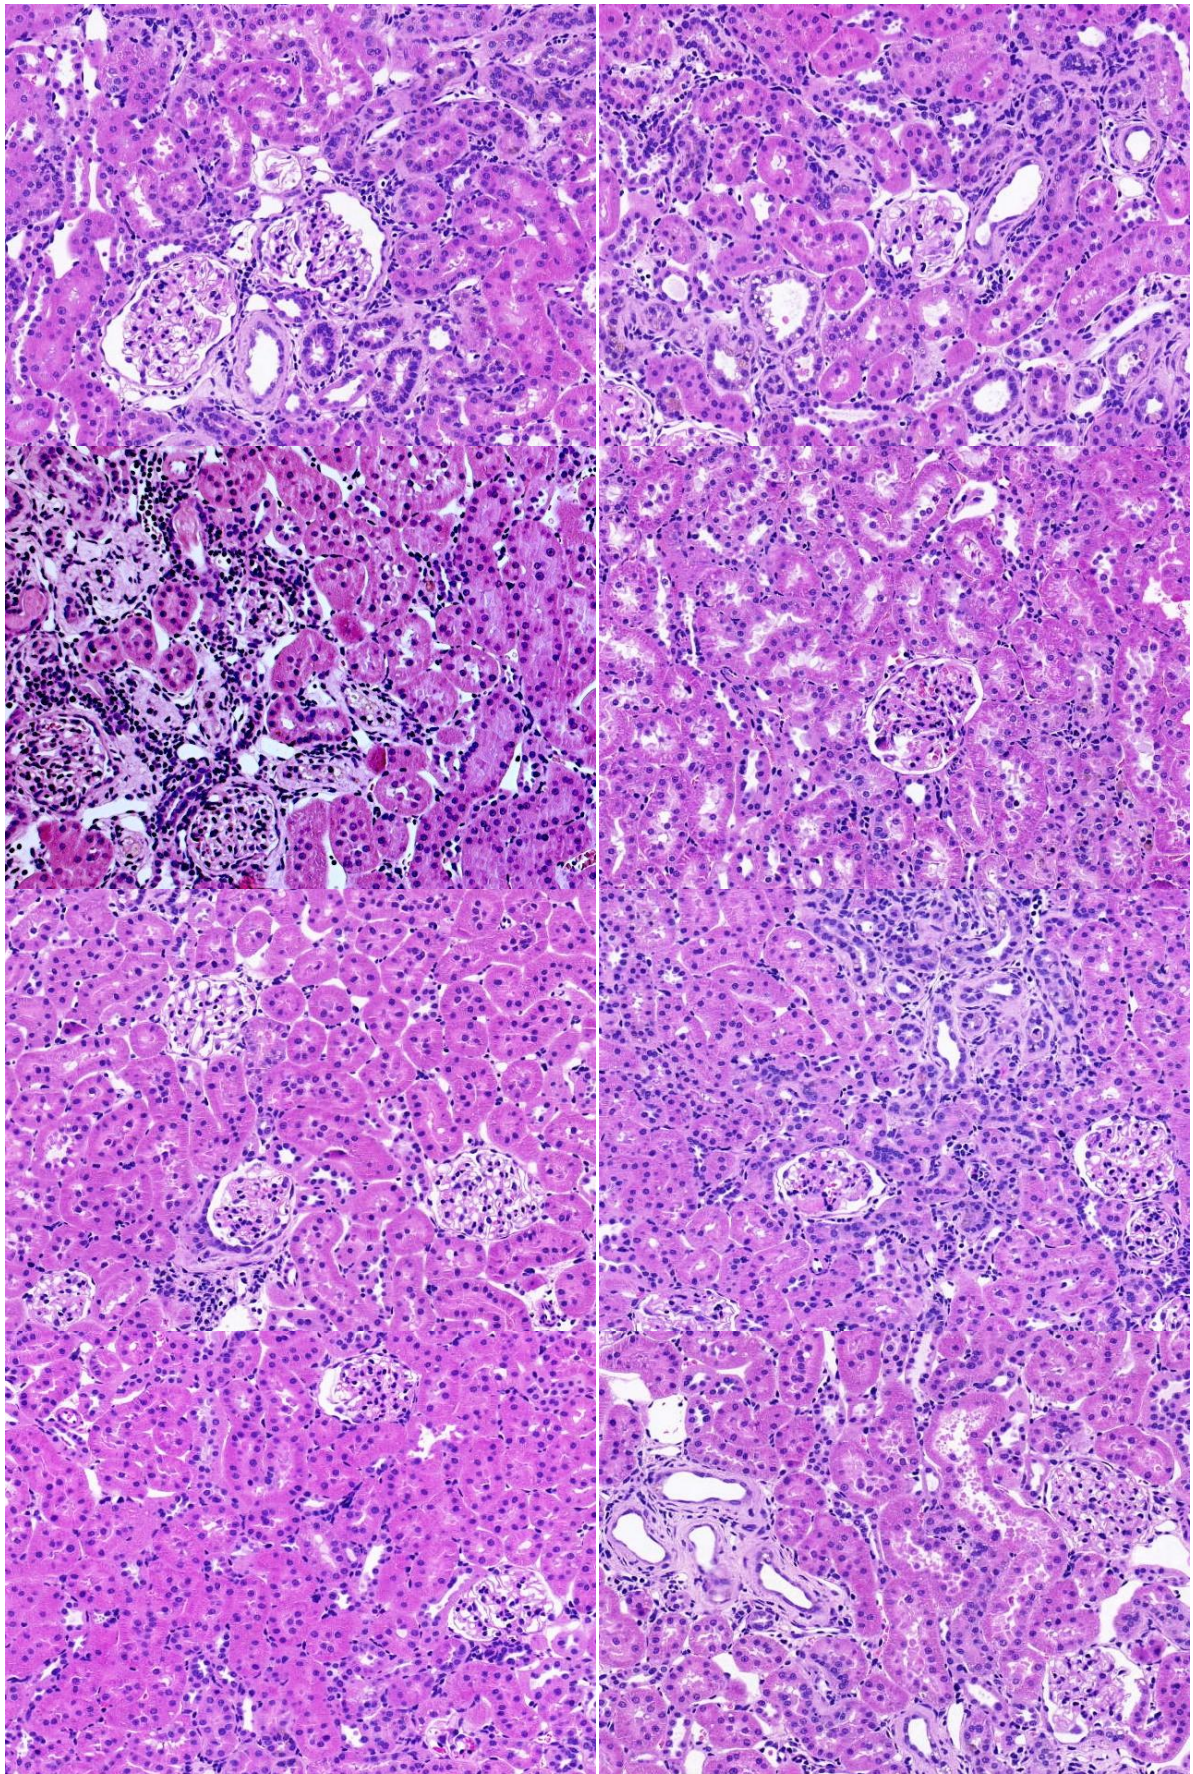

CD/DXR:

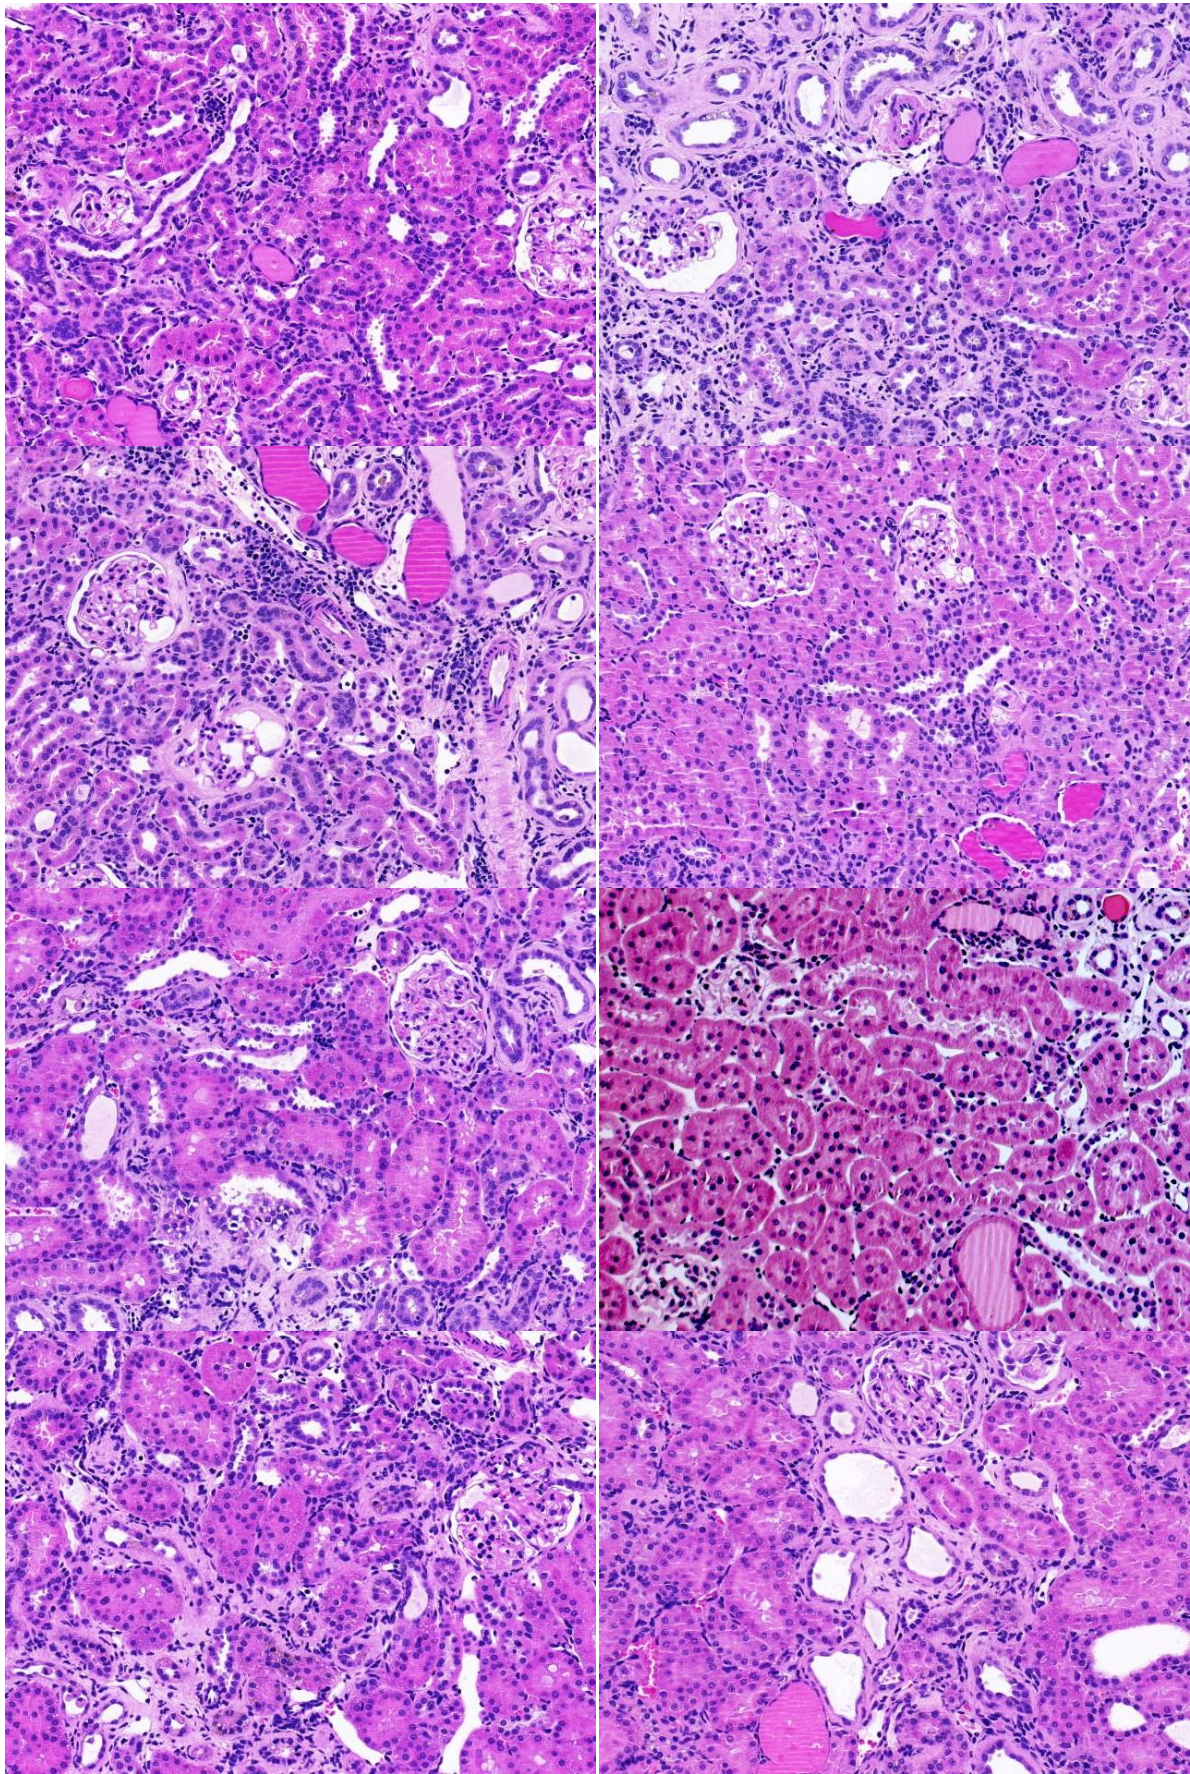

Supplement: pone.0127090.s001.pdf [file pone.0127090.s001.pdf]
